# Supplementary material for: Risk Factors of Periprocedural Bradycardia during Primary Percutaneous Coronary Intervention in Patients with Acute ST-Elevation Myocardial Infarction
Source: Cardiol Res Pract. 2019 Nov 15;2019:4184702. doi: 10.1155/2019/4184702 (PMC6881770; doi:10.1155/2019/4184702)
Supplement: Supplementary Materials — The data are demographic, clinical, and angiographic characteristics of patients during PPCI. PB = periprocedural bradycardia; CNR = coronary artery no-reflow phenomenon; AGE = age; G = gender; HH = hypertension history; DH = diabetes history; CADH = coronary heart disease history culprit vessel site; LAD = left anterior descending; LCX = left circumflex coronary artery; RCA = right coronary artery; CBCV = completely block of culprit vessel; IH = intraoperative hypotension; TA = using thrombus aspiration devices during operation. [file 4184702.f1.csv]

HH	DH	LAD	RCA	LCX	TA	IH	CNR	AGE	PB	G	CBCV	CADH
0	0	1	0	0	1	0	0	62	0	1	1	0
0	0	0	1	0	1	0	0	64	0	1	0	0
0	0	0	1	0	1	0	0	42	0	1	1	0
0	1	1	0	0	0	0	0	55	0	1	0	0
1	1	1	0	0	1	0	0	63	0	1	1	1
1	1	0	1	0	0	0	0	38	0	1	0	1
1	0	0	1	0	0	0	0	39	0	1	1	0
1	0	0	1	0	0	0	0	51	0	1	0	0
1	1	0	0	1	0	0	0	53	1	1	1	1
1	0	1	0	0	0	0	0	58	0	1	0	1
0	0	0	1	0	1	0	0	58	0	1	0	0
1	0	0	1	0	0	0	0	66	0	1	0	1
0	0	1	0	0	0	0	0	70	0	0	1	0
1	0	1	0	0	1	0	0	70	1	1	0	1
1	0	1	0	0	0	0	0	56	0	1	0	1
1	0	1	0	0	0	0	0	57	0	1	0	1
0	0	1	0	0	1	0	0	58	0	1	1	1
0	0	1	0	0	1	0	0	58	0	1	1	1
1	0	1	0	0	0	0	0	43	0	1	0	1
1	1	0	1	0	0	0	0	45	0	1	1	1
0	1	0	1	0	0	0	0	49	0	1	0	1
1	0	0	1	0	1	0	0	50	0	1	0	1
0	0	0	0	1	1	0	0	60	0	1	1	0
0	0	1	0	0	0	0	0	60	0	1	0	1
0	1	1	0	0	1	0	0	64	0	1	1	0
1	1	0	1	0	1	0	0	45	0	1	1	0
1	1	0	1	0	1	0	0	45	0	1	1	1
0	0	0	1	0	1	0	0	51	1	1	0	1
0	0	0	1	0	0	0	0	57	0	1	1	1
0	0	1	0	0	0	0	0	33	0	1	0	1
0	0	1	0	0	0	0	0	42	0	1	1	0
1	0	0	1	0	1	0	0	33	1	1	1	1
1	0	0	1	0	1	1	0	38	1	1	1	1
0	0	0	0	1	1	0	0	44	1	1	0	0
0	0	1	0	0	1	1	0	45	1	1	1	1
1	0	0	1	0	1	0	0	47	0	1	1	0
0	0	1	0	0	1	0	0	47	0	1	1	0
0	0	0	0	1	0	1	0	49	1	1	1	1
0	0	1	0	0	1	0	0	49	0	1	1	0
1	0	1	0	0	1	0	0	51	1	1	1	0
1	0	0	0	1	0	1	0	51	1	1	1	1
0	0	0	1	0	1	0	0	52	0	1	1	0
1	0	0	0	1	0	1	0	52	1	1	1	0
1	0	0	1	0	0	0	0	53	0	1	0	1
1	0	1	0	0	0	0	0	55	0	0	0	1
1	0	1	0	0	0	0	0	56	0	1	1	1
1	0	1	0	0	0	0	0	56	0	1	1	1
1	0	1	0	0	1	0	0	57	0	1	0	1
0	1	1	0	0	1	0	0	57	0	1	1	1
0	0	0	0	1	0	0	0	58	0	0	0	0
1	1	0	1	0	1	0	0	61	0	1	1	0
1	0	0	0	1	0	0	1	64	0	1	0	1
0	0	0	1	0	1	0	0	64	0	1	0	1
1	0	0	1	0	1	0	1	64	1	1	1	1
0	0	1	0	0	1	0	0	65	0	1	1	1
0	0	1	0	0	1	0	0	66	0	1	1	0
0	0	1	0	0	1	0	0	67	0	1	1	1
1	0	0	0	1	0	0	0	68	0	1	1	0
1	0	0	1	0	0	0	0	69	0	1	0	0
0	0	0	1	0	1	0	0	70	0	1	1	1
1	0	1	0	0	0	0	0	70	0	1	0	1
1	1	1	0	0	1	0	0	71	0	0	1	1
0	0	1	0	0	1	0	0	72	0	1	1	0
1	0	0	1	0	1	0	0	72	0	1	0	1
1	1	1	0	0	0	0	0	74	0	0	0	1
0	0	1	0	0	1	0	0	74	0	0	1	1
1	0	0	1	0	0	0	0	75	0	1	0	0
1	0	1	0	0	1	0	0	77	0	1	1	0
1	0	1	0	0	0	0	0	78	0	1	1	1
0	1	1	0	0	0	0	0	48	0	1	1	0
1	0	1	0	0	0	0	0	68	0	1	0	0
0	0	1	0	0	1	0	0	38	0	1	0	0
0	0	0	1	0	1	1	0	58	1	1	1	1
1	0	1	0	0	0	0	0	62	0	1	0	0
0	0	1	0	0	1	0	0	65	0	1	1	0
1	0	1	0	0	0	0	0	80	0	1	0	1
0	0	0	1	0	0	0	0	61	1	1	0	1
0	0	0	1	0	0	0	0	39	0	1	0	1
0	0	0	1	0	1	0	0	53	1	1	1	0
0	1	0	1	0	1	0	0	54	0	1	1	1
1	0	0	1	0	0	0	0	62	0	1	0	1
1	0	0	0	0	0	1	0	64	0	1	1	1
1	0	0	1	0	1	0	0	72	0	1	1	0
0	0	0	1	0	1	0	0	73	0	1	1	1
1	0	0	1	0	0	0	0	74	0	1	0	1
1	0	1	0	0	1	0	0	68	1	0	1	0
0	0	1	0	0	1	0	0	34	0	1	1	1
1	1	0	1	0	1	0	0	36	0	1	1	1
0	1	1	0	0	1	1	0	52	1	1	1	1
1	0	0	1	0	1	0	0	53	1	1	1	1
0	0	1	0	0	1	0	1	63	0	1	1	0
0	0	1	0	0	0	0	0	56	0	1	0	1
0	0	0	1	0	1	1	1	63	1	1	1	1
1	0	1	0	0	1	0	0	63	0	1	1	1
0	0	1	0	0	1	0	0	68	0	0	1	1
0	0	0	0	1	0	0	0	40	0	1	1	1
1	0	1	0	0	0	0	0	42	0	1	0	1
0	1	1	0	0	1	0	0	43	0	1	1	1
0	0	1	0	0	1	0	0	46	0	1	0	1
0	0	1	0	0	1	0	0	48	0	1	1	0
0	0	1	0	0	0	0	0	48	0	1	0	1
0	0	1	0	0	1	0	0	49	0	1	1	0
0	0	1	0	0	0	0	0	49	0	1	0	0
0	0	0	1	0	1	1	0	49	1	1	1	1
1	0	0	1	0	1	1	0	54	0	1	1	0
0	0	0	1	0	0	0	0	55	0	1	0	0
1	1	0	1	0	1	0	0	56	0	0	1	1
0	0	0	1	0	1	0	0	57	0	1	1	1
1	0	0	0	1	1	0	0	58	0	1	1	0
0	0	1	0	0	1	0	0	59	0	1	1	0
1	0	1	0	0	1	0	0	61	0	1	1	1
1	1	0	1	0	0	0	0	62	1	1	1	1
1	1	1	0	0	1	1	0	63	0	1	1	0
1	0	0	1	0	0	0	0	64	0	1	1	0
0	0	0	1	0	1	0	0	64	0	1	1	1
1	0	0	1	0	0	0	0	67	0	1	0	1
0	0	0	0	1	0	0	0	68	0	1	0	0
1	0	1	0	0	1	0	0	70	0	0	1	0
0	1	1	0	0	1	0	0	72	0	0	1	1
0	0	0	1	0	1	0	0	73	0	1	1	0
0	0	1	0	0	1	0	0	75	0	1	0	1
0	0	1	0	0	1	0	0	75	0	1	1	1
0	0	1	0	0	1	0	0	75	0	1	0	1
1	1	0	1	0	0	0	0	77	0	1	1	1
0	0	1	0	0	1	0	0	62	1	1	0	1
1	0	1	0	0	0	0	0	59	0	1	1	1
1	0	1	0	0	1	0	0	55	0	1	1	0
0	0	1	0	0	0	0	1	79	0	0	0	0
0	0	1	0	0	1	0	0	44	1	1	0	0
1	0	1	0	0	1	0	0	58	1	1	1	1
1	0	1	0	0	0	0	0	66	0	1	0	1
1	1	1	0	0	0	0	0	44	0	1	0	0
0	0	1	0	0	0	0	0	45	0	1	0	1
1	0	0	1	0	1	0	0	46	0	1	1	0
0	0	0	1	0	1	1	0	50	1	1	1	0
1	0	0	0	1	0	0	0	60	0	1	0	0
1	0	1	0	0	0	0	0	60	0	1	0	1
1	0	0	1	0	0	0	0	68	0	0	0	1
1	1	0	1	0	1	0	1	70	1	1	1	1
1	0	0	1	0	0	0	0	71	0	1	0	1
0	0	0	0	1	0	0	0	77	0	1	1	1
0	1	1	0	0	1	0	0	69	0	1	1	0
0	1	1	0	0	1	0	0	69	0	1	1	0
1	0	0	0	1	1	0	0	44	0	1	1	1
1	1	0	1	0	1	0	0	48	0	1	1	0
0	0	1	0	0	1	0	1	61	0	1	0	0
1	0	1	0	0	1	1	0	61	0	1	1	1
1	0	1	0	0	1	0	0	68	0	1	0	1
1	0	0	1	0	1	0	1	78	1	1	1	1
1	1	1	0	0	0	0	0	36	0	1	1	1
0	1	1	0	0	0	0	0	39	0	1	0	0
1	0	1	0	0	0	0	0	48	0	1	0	1
0	0	0	1	0	1	0	0	48	1	1	1	0
0	0	1	0	0	1	0	0	51	0	1	1	1
1	0	1	0	0	0	0	0	53	0	1	0	1
0	0	0	1	0	1	0	0	53	0	1	1	1
1	0	1	0	0	0	0	0	60	0	1	0	1
0	0	1	0	0	1	0	0	65	0	1	1	1
0	0	1	0	0	1	0	0	74	0	1	1	0
1	1	1	0	0	1	0	0	52	0	1	1	1
0	0	1	0	0	0	0	0	38	0	1	1	1
0	0	1	0	0	1	0	1	38	1	1	1	0
1	1	0	1	0	1	0	1	39	1	1	1	0
0	0	1	0	0	1	0	0	41	0	1	0	1
1	0	1	0	0	0	0	0	42	0	1	0	1
0	1	1	0	0	0	0	0	42	0	1	1	0
0	1	1	0	0	1	0	0	42	0	1	0	0
1	0	1	0	0	1	0	0	42	0	1	1	0
1	0	0	0	1	1	0	0	45	1	0	1	0
1	0	0	1	0	1	0	0	46	1	1	1	0
0	0	0	1	0	1	0	0	46	1	1	1	1
0	0	1	0	0	1	0	0	47	0	1	0	0
1	0	1	0	0	0	0	0	48	0	1	0	1
1	0	0	0	1	1	0	0	49	1	1	0	0
0	0	1	0	0	0	1	1	49	1	1	1	1
1	0	0	0	1	1	0	0	49	1	1	0	0
0	0	1	0	0	1	0	0	50	0	1	1	0
0	0	1	0	0	1	0	0	50	0	1	1	0
0	0	0	1	0	1	0	0	50	0	1	1	0
1	0	0	1	0	1	0	0	50	0	1	1	0
0	0	1	0	0	1	0	0	50	0	1	1	0
0	0	0	1	0	0	0	0	50	0	1	0	1
0	0	0	1	0	0	0	0	50	0	1	1	0
0	0	1	0	0	0	0	0	50	0	1	1	0
0	1	1	0	0	0	0	0	51	0	1	0	1
1	0	1	0	0	0	0	0	51	0	1	0	1
0	1	1	0	0	0	0	0	52	0	1	0	1
1	1	0	1	0	0	0	0	53	0	1	0	1
1	1	0	1	0	1	0	0	53	1	1	1	1
1	0	0	0	1	0	0	0	53	0	1	0	1
0	0	0	1	0	1	0	0	53	0	1	1	0
0	0	0	1	0	0	0	0	54	0	1	0	0
0	0	0	1	0	1	0	0	54	0	1	1	0
1	1	1	0	0	1	0	0	54	0	1	1	1
1	1	0	1	0	1	0	1	54	0	1	1	0
0	0	1	0	0	1	0	0	55	0	1	1	1
0	1	0	1	0	1	0	0	55	1	1	1	1
0	0	1	0	0	1	1	0	55	1	1	1	0
0	0	0	0	1	0	0	1	55	0	1	1	0
0	0	1	0	0	1	0	0	55	0	1	1	1
1	0	1	0	0	0	0	0	56	0	1	1	1
1	1	0	1	0	0	0	0	56	1	1	0	0
1	1	0	1	0	0	0	0	56	0	0	0	1
0	0	1	0	0	1	0	0	56	0	1	1	1
0	0	0	0	1	1	0	0	56	1	1	1	1
1	0	1	0	0	0	0	1	56	0	0	1	1
1	1	0	1	0	1	0	0	57	1	1	0	1
0	0	1	0	0	0	0	0	58	0	1	0	1
0	0	1	0	0	1	0	0	59	0	1	1	0
0	1	0	1	0	1	0	0	60	0	1	1	0
0	0	0	1	0	1	0	0	60	0	1	1	0
1	0	1	0	0	0	0	0	60	0	1	0	0
0	0	0	1	0	1	0	1	60	1	1	1	0
1	0	0	0	1	1	0	0	60	0	1	1	1
0	0	1	0	0	1	0	0	61	0	1	1	1
1	0	1	0	0	1	0	0	61	0	1	1	0
1	0	0	0	1	0	0	0	62	0	1	1	1
1	0	0	1	0	1	0	0	62	0	1	1	0
0	1	0	1	0	1	0	0	63	1	1	1	1
1	0	0	0	1	0	1	0	63	0	1	1	0
1	0	0	1	0	0	0	0	63	0	0	1	0
1	0	0	0	1	0	0	0	63	0	0	1	1
0	1	0	1	0	0	0	0	64	0	0	0	0
0	0	1	0	0	1	0	0	65	0	1	1	1
0	0	0	0	1	1	0	0	65	1	1	1	1
1	1	0	1	0	0	1	1	65	0	1	0	0
1	0	0	1	0	1	0	0	65	0	1	0	0
0	0	1	0	0	1	0	1	65	0	1	1	0
1	0	1	0	0	1	0	1	66	0	0	1	0
1	0	0	1	0	1	0	0	66	0	0	1	0
1	0	0	1	0	0	0	0	66	0	1	0	0
1	0	1	0	0	0	0	1	67	0	1	0	1
0	0	0	1	0	1	0	0	67	0	1	1	0
1	1	1	0	0	1	0	0	67	0	1	1	1
1	1	0	1	0	0	0	0	67	0	1	0	0
1	0	0	1	0	1	0	1	67	1	1	1	1
1	0	0	1	0	1	0	0	68	0	1	1	0
1	0	1	1	0	1	0	0	69	0	1	1	1
1	0	0	1	0	0	0	0	69	0	1	1	1
0	0	0	1	0	1	1	0	70	0	1	1	1
0	0	0	1	0	0	1	0	70	1	1	1	0
0	0	1	0	0	0	0	0	71	0	1	1	1
1	1	1	0	0	1	0	0	73	0	0	1	1
0	0	1	0	0	0	0	1	73	0	0	0	1
0	0	1	0	0	1	0	1	74	1	0	1	1
0	1	0	1	0	1	0	1	75	1	1	1	1
0	0	1	0	0	0	0	0	76	0	1	1	0
1	0	0	1	0	1	0	1	77	1	1	1	1
0	0	1	0	0	0	0	0	77	0	0	1	1
1	0	1	0	0	1	0	0	77	0	0	1	0
1	0	0	1	0	1	0	0	80	1	0	1	1
0	0	1	0	0	0	0	0	48	0	0	0	1
1	1	0	1	0	1	0	0	63	1	0	0	1
1	1	0	1	0	0	0	1	68	0	1	0	1
1	1	0	1	0	0	1	1	69	1	1	1	0
0	0	1	0	0	1	0	0	54	0	1	1	0
0	0	0	0	1	0	0	0	53	0	1	0	1
0	0	0	1	0	1	0	0	52	0	1	1	0
1	0	1	0	0	1	0	0	54	0	1	1	1
1	0	1	0	0	0	0	1	58	0	1	1	1
1	1	0	1	0	1	0	0	58	1	0	1	1
1	0	0	1	0	1	0	1	61	1	0	1	0
1	0	0	1	0	1	1	0	62	1	1	1	1
0	0	0	1	0	1	0	0	65	0	1	1	1
1	0	1	0	0	1	0	0	73	0	1	1	1
0	1	0	1	0	1	0	0	71	0	0	1	0
0	0	1	0	0	0	0	0	43	0	1	0	1
1	1	1	0	0	1	0	0	50	0	1	1	0
1	0	0	0	1	1	0	0	51	0	1	1	1
0	0	1	0	0	1	0	0	57	0	1	0	0
0	0	1	0	0	1	0	1	60	0	1	0	1
0	0	1	0	0	1	0	1	73	0	1	1	0
1	0	0	1	0	0	0	0	74	0	0	0	1
1	0	0	0	1	1	0	0	45	1	1	1	0
0	0	1	0	0	1	0	0	61	0	1	1	0
1	0	0	1	0	1	0	1	44	0	1	1	1
0	0	0	0	1	1	0	0	45	1	1	1	0
0	0	1	0	0	0	0	0	47	1	1	1	1
1	0	1	0	0	1	1	0	47	0	1	1	1
1	1	1	0	0	1	0	0	47	0	1	1	0
1	0	1	0	0	0	0	0	51	0	1	0	0
0	0	1	0	0	1	0	0	57	0	1	1	1
0	0	0	1	0	1	0	0	58	0	1	1	1
0	0	0	0	1	0	0	0	58	0	1	0	1
1	1	1	0	0	1	0	0	61	0	1	1	1
0	1	1	0	0	1	0	1	70	0	0	1	0
1	0	1	0	0	1	1	0	67	0	1	1	1
1	0	0	1	0	0	0	0	54	0	1	0	1
1	0	1	0	0	0	0	0	34	0	1	0	0
1	0	0	1	0	0	0	0	50	0	1	0	1
0	0	1	0	0	1	0	0	60	0	1	1	1
1	0	1	0	0	1	0	0	60	0	0	0	1
0	1	1	0	0	0	0	0	60	0	1	1	1
1	0	1	0	0	0	0	0	63	0	1	1	0
1	0	0	1	0	1	1	0	66	1	1	1	0
0	0	0	1	0	1	0	0	40	0	1	0	0
0	0	1	0	0	1	0	0	61	0	1	1	1
0	0	1	0	0	1	0	0	33	0	1	0	1
0	0	0	1	0	1	0	0	36	0	1	1	0
1	0	0	1	0	0	0	0	38	0	1	1	1
0	0	1	0	0	1	0	0	39	0	0	0	1
1	1	1	0	0	0	0	0	43	0	1	0	1
1	0	1	0	0	0	0	0	43	0	1	0	1
1	0	1	0	0	0	0	0	43	0	1	0	1
1	0	1	0	0	0	0	0	44	0	1	0	0
1	0	0	1	0	1	0	0	46	0	1	0	0
0	0	0	1	0	0	0	0	47	1	1	1	0
0	0	1	0	0	1	0	0	50	1	1	1	0
1	0	1	0	0	1	0	0	52	0	0	1	1
0	1	0	1	0	1	1	1	53	1	1	1	1
1	0	0	1	0	1	0	0	53	1	1	1	1
0	0	0	1	0	1	0	0	54	0	1	0	1
0	0	0	1	0	1	0	0	56	1	1	0	0
1	1	0	1	0	1	1	1	56	1	1	0	1
1	0	0	1	0	0	0	0	58	1	0	0	1
1	0	1	0	0	1	0	0	59	0	1	1	1
1	1	1	0	0	0	0	0	60	0	1	0	1
1	0	1	0	0	1	0	0	60	1	1	1	1
0	1	1	0	0	0	0	0	61	0	1	1	1
0	0	0	1	0	0	0	0	63	0	0	0	0
1	1	1	0	0	1	1	0	63	1	0	1	1
1	0	1	0	0	0	0	0	63	1	1	1	1
1	0	1	0	0	1	0	0	63	1	1	1	1
1	0	0	1	0	0	0	0	63	1	1	1	0
1	0	0	0	1	0	0	0	64	0	1	1	0
0	1	1	0	0	1	0	0	65	0	1	1	1
1	0	1	0	0	1	0	0	66	0	1	1	1
1	0	0	1	0	1	0	0	67	0	1	1	1
1	1	1	0	0	0	0	1	69	0	0	0	0
1	0	0	1	0	1	0	0	71	0	1	0	0
1	0	0	1	0	1	0	0	73	0	1	1	0
1	0	0	1	0	1	0	1	73	1	1	1	0
1	1	1	0	0	0	0	0	74	0	1	0	1
0	0	0	1	0	1	1	0	76	1	1	1	1
1	1	1	0	0	1	0	0	77	0	0	1	0
1	0	1	0	0	1	0	0	78	0	1	1	1
0	0	1	0	0	1	0	1	80	0	0	1	0
0	0	1	0	0	1	0	0	41	0	1	1	0
1	0	1	0	0	0	0	0	75	0	0	1	1
0	0	0	1	0	1	0	0	50	0	1	0	1
1	0	0	1	0	1	1	1	54	1	1	1	0
0	0	1	0	0	1	0	0	56	0	1	1	1
0	0	1	0	0	1	0	1	56	0	1	1	1
0	0	0	1	0	0	1	0	56	1	1	0	1
1	0	1	0	0	0	0	0	61	0	1	0	1
0	0	1	0	0	0	1	0	65	0	1	1	1
1	0	1	0	0	1	0	0	75	0	1	0	1
0	0	1	0	0	0	0	0	51	0	1	0	1
0	0	1	0	0	1	0	0	45	0	1	1	1
0	0	1	0	0	0	0	0	40	0	1	0	1
1	0	1	0	0	1	0	0	41	0	1	0	1
1	0	1	0	0	1	0	0	64	1	1	1	1
1	0	0	0	1	1	0	1	71	0	1	1	1
0	0	0	1	0	1	1	0	74	1	1	1	1
0	1	1	0	0	0	0	0	54	0	1	0	1
1	1	0	0	1	0	0	0	61	0	1	0	1
1	0	0	1	0	1	0	0	50	0	1	1	1
1	0	1	0	0	1	0	1	51	0	1	1	0
0	0	0	1	0	1	0	0	52	0	1	1	0
0	0	0	0	1	0	0	0	52	0	1	0	0
1	0	0	1	0	0	0	0	59	0	1	0	0
1	0	0	1	0	1	0	0	60	0	1	0	0
0	0	1	0	0	1	1	0	61	1	1	1	0
1	0	1	0	0	0	0	0	63	0	1	0	0
1	0	0	1	0	1	0	0	68	1	1	1	1
1	1	1	0	0	0	0	0	75	0	1	0	1
1	0	1	0	0	1	1	0	78	0	0	1	0
1	1	1	0	0	1	0	0	38	0	1	1	0
0	0	1	0	0	0	0	0	48	0	1	0	1
1	1	0	1	0	1	0	0	51	0	1	1	0
1	0	1	0	0	0	0	0	55	1	1	1	1
0	0	1	0	0	0	0	0	57	0	1	1	1
1	0	0	0	1	0	0	0	70	0	0	0	1
0	0	1	0	0	1	0	0	26	0	1	1	0
0	0	0	1	0	1	1	0	28	1	1	1	1
0	0	0	1	0	1	0	0	29	1	1	1	1
0	0	0	1	0	1	0	1	30	1	1	1	1
0	0	0	1	0	1	0	0	34	0	1	1	1
0	0	0	1	0	1	0	0	36	0	1	0	0
1	0	1	0	0	1	0	0	37	0	1	1	1
1	0	1	0	0	0	0	0	40	0	1	0	1
0	0	1	0	0	1	0	0	43	0	1	1	1
0	0	1	0	0	1	0	0	43	0	1	1	0
0	0	1	0	0	1	0	0	43	0	1	1	1
1	0	0	1	0	0	0	0	44	0	1	1	1
0	0	1	0	0	1	1	0	44	0	1	1	0
0	0	1	0	0	1	0	0	45	0	1	1	1
1	0	1	0	0	0	0	0	45	0	0	1	0
0	0	0	1	0	1	0	0	45	1	1	1	1
0	0	1	0	0	0	0	0	45	0	1	0	1
0	0	0	1	0	0	0	0	46	0	1	0	0
0	0	1	0	0	1	0	0	46	0	1	1	1
0	1	0	0	1	0	0	0	46	1	1	1	1
1	0	0	0	1	0	0	0	47	0	1	1	0
0	0	1	0	0	0	0	0	47	0	0	0	0
0	0	0	0	1	1	0	0	47	0	0	1	0
0	0	1	0	0	1	0	0	47	0	1	1	0
1	0	0	0	1	1	0	1	48	0	1	1	0
1	0	1	0	0	1	0	0	48	0	1	1	0
0	1	0	1	0	1	1	0	49	1	1	0	1
0	0	1	0	0	0	0	0	49	0	1	0	0
1	0	0	1	0	1	0	0	49	0	1	1	1
0	0	1	0	0	0	0	0	50	0	1	0	0
0	1	1	0	0	0	0	0	51	0	0	0	0
0	0	1	0	0	1	0	0	51	0	1	1	1
1	0	1	0	0	0	0	0	52	0	1	0	1
1	1	1	0	0	1	0	0	52	0	0	1	1
0	0	1	0	0	1	0	0	52	0	1	1	0
1	0	1	0	0	0	0	0	54	0	1	0	1
1	1	1	0	0	0	0	0	55	0	1	1	0
0	0	0	1	0	0	0	0	55	1	0	0	1
0	0	1	0	0	1	0	1	55	0	1	1	0
1	1	1	0	0	1	0	0	55	0	1	1	0
1	0	1	0	0	1	0	0	55	0	1	1	0
0	0	1	0	0	1	0	0	55	0	1	1	0
1	0	1	0	0	1	0	0	56	0	1	1	0
1	0	1	0	0	0	0	0	56	0	1	0	1
1	0	1	0	0	1	0	0	57	0	1	1	0
0	0	0	1	0	1	0	0	57	0	0	1	0
1	0	1	0	0	1	0	0	57	0	1	1	1
0	0	1	0	0	1	0	0	58	1	1	1	0
1	0	1	0	0	0	0	0	58	0	1	1	1
0	0	0	1	0	0	0	0	58	0	1	0	1
1	0	0	1	0	0	0	0	59	0	1	0	0
1	1	0	1	0	1	0	0	59	1	0	1	0
1	1	1	0	0	1	0	0	59	0	1	0	1
0	0	1	0	0	0	1	0	59	1	1	1	0
0	0	0	1	1	0	1	0	60	0	1	1	0
1	0	0	0	1	1	1	0	60	0	1	1	0
1	0	1	0	0	1	0	0	60	0	1	1	1
1	1	0	1	0	0	0	0	60	0	1	1	1
1	0	1	0	0	1	0	0	60	0	1	1	1
0	0	0	0	1	1	1	0	60	0	1	1	0
0	1	1	0	0	1	0	0	61	0	1	1	0
0	0	0	0	1	1	0	0	61	1	1	1	1
0	1	1	0	0	1	0	0	61	0	1	1	1
1	0	1	0	0	0	0	0	62	0	1	1	1
0	0	1	0	0	1	0	0	62	0	1	1	0
0	0	1	0	0	0	0	0	62	0	1	0	1
1	1	0	1	0	0	0	0	63	0	1	0	0
1	0	1	0	0	0	0	0	63	0	0	1	0
1	0	0	1	0	0	0	0	63	0	1	0	1
1	0	0	1	0	0	0	0	63	0	1	0	0
1	0	1	0	0	0	0	0	64	0	1	1	1
1	1	0	1	0	0	1	1	64	1	1	1	1
1	0	1	0	0	1	0	0	66	0	1	1	1
0	1	1	0	0	1	0	0	66	1	1	0	1
0	0	1	0	0	0	0	1	67	0	1	0	1
0	0	0	1	0	1	0	0	67	0	1	1	0
1	1	1	0	0	1	0	0	67	0	1	0	1
0	0	0	0	1	1	1	0	68	1	1	1	0
1	1	1	0	0	1	0	1	69	0	1	1	0
1	0	0	1	0	1	0	0	71	1	1	0	1
1	0	0	1	0	1	1	0	72	1	1	1	1
1	0	1	0	0	1	0	0	75	0	0	1	1
1	0	1	0	0	0	0	0	75	0	1	0	1
0	0	0	1	0	1	0	0	75	1	1	0	1
0	1	1	0	0	1	0	0	75	0	0	1	0
1	1	1	0	0	1	0	0	75	0	1	1	1
1	1	1	0	0	1	0	0	76	0	0	0	0
1	0	0	1	0	0	0	0	77	0	0	0	1
0	1	0	0	1	0	0	0	77	0	1	0	1
1	0	0	1	0	0	0	0	77	0	1	1	1
1	0	0	1	0	0	0	0	78	0	1	0	0
1	1	0	0	1	0	0	0	78	0	0	0	1
1	0	1	0	0	1	0	0	79	0	0	1	1
1	0	1	0	0	0	0	0	34	0	1	0	0
1	1	0	1	0	0	0	0	59	0	0	0	1
0	0	0	1	0	1	0	0	66	0	1	1	1
1	0	0	1	0	1	0	0	76	1	0	1	1
0	0	1	0	0	0	0	0	66	0	1	1	1
1	0	0	0	1	1	0	0	63	0	1	1	0
1	1	1	0	0	1	0	0	68	0	1	1	0
0	0	0	1	0	1	0	0	39	1	1	1	1
1	0	1	0	0	0	0	0	45	0	1	0	1
0	1	1	0	0	1	0	0	52	0	1	1	1
0	1	0	0	1	0	0	0	59	0	1	1	0
1	1	1	0	0	1	0	0	69	0	0	1	1
1	0	0	1	0	1	1	0	59	1	1	1	0
1	0	0	1	0	1	1	0	63	1	1	0	1
1	0	1	0	0	1	0	1	64	0	0	1	0
1	0	0	1	0	1	0	0	39	0	1	1	0
0	0	0	1	0	0	0	0	53	1	1	0	1
1	0	1	0	0	0	0	0	55	0	1	0	1
1	0	1	0	0	0	0	0	61	0	1	0	1
1	1	1	0	0	0	0	0	62	0	0	0	1
1	0	0	1	0	1	1	1	71	1	0	1	1
0	0	1	0	0	1	0	0	45	0	1	1	1
0	1	0	1	0	0	0	0	39	0	1	0	1
1	0	1	0	0	1	0	0	44	0	1	1	1
1	0	0	0	1	1	0	0	44	1	1	1	1
1	0	1	0	0	0	0	0	45	0	1	0	1
0	0	1	0	0	0	0	0	53	0	1	1	1
0	0	0	1	0	1	0	0	57	0	1	1	0
0	1	1	0	0	1	0	0	58	0	1	0	0
0	0	0	1	0	0	0	0	60	0	1	1	1
1	1	0	1	0	1	0	0	68	0	1	1	1
1	1	0	1	0	1	0	0	70	0	1	1	1
1	0	0	1	0	0	0	0	80	0	1	0	0
0	1	1	0	0	1	1	1	80	0	0	1	1
0	0	1	0	0	0	0	0	48	0	1	0	0
0	0	0	0	1	0	0	0	60	0	1	0	1
1	1	0	1	0	1	0	0	57	0	1	1	0
0	0	1	0	0	1	0	1	25	0	1	1	1
0	0	0	1	0	1	0	0	30	0	1	1	0
0	1	1	0	0	1	0	1	35	0	1	0	0
0	0	1	0	0	0	0	0	44	0	1	0	1
1	0	0	1	0	1	1	1	50	1	1	1	1
1	0	0	1	0	0	0	0	53	0	1	0	1
1	0	0	0	1	1	0	0	53	1	1	1	0
0	1	0	1	0	1	0	0	53	0	1	1	1
0	0	0	1	0	0	0	0	54	0	1	0	1
0	0	0	1	0	0	0	0	54	0	1	0	1
1	1	1	0	0	1	0	0	55	0	1	1	0
0	0	0	1	0	1	0	0	56	1	1	1	0
1	1	1	0	0	0	0	0	56	1	0	1	0
1	0	0	1	0	0	0	0	57	0	1	0	0
0	1	0	1	0	1	0	0	59	0	1	0	0
0	0	1	0	0	1	0	0	60	0	1	1	1
1	0	0	1	0	1	0	0	60	0	1	1	1
0	0	1	0	0	0	0	0	61	0	1	0	1
0	0	0	1	0	0	0	0	61	0	0	0	1
1	0	0	1	0	1	1	0	62	0	1	1	1
0	0	1	0	0	1	0	0	63	0	1	1	1
0	0	0	1	0	1	0	0	64	0	1	1	0
1	0	1	0	0	1	0	0	66	0	1	1	1
1	0	0	1	0	1	0	0	69	1	0	1	1
0	0	0	1	0	1	0	0	70	1	1	1	1
1	0	0	1	0	1	1	0	70	1	0	1	0
0	0	0	0	1	1	0	0	70	1	0	1	1
0	0	0	0	1	1	0	0	71	1	1	1	1
1	0	0	1	0	0	0	0	71	0	1	0	0
1	0	0	1	0	1	0	0	72	1	0	1	1
1	0	1	0	0	1	0	0	76	0	0	1	1
0	0	1	0	0	0	0	1	78	0	0	1	1
0	0	0	1	0	1	0	0	80	1	0	1	0
1	0	1	0	0	0	0	0	49	0	1	0	1
0	1	1	0	0	1	0	0	56	0	1	1	1
1	0	1	0	0	0	0	0	75	0	1	1	0
0	0	0	0	1	1	0	0	51	0	1	1	0
1	0	0	1	0	0	0	0	43	1	1	0	0
0	0	0	1	0	1	0	0	38	1	1	1	0
0	0	1	0	0	0	0	0	40	0	1	1	0
1	1	0	1	0	1	0	0	48	1	1	1	0
0	0	0	1	0	1	0	0	49	0	1	0	0
0	1	0	0	1	1	0	0	52	0	1	1	1
0	0	0	1	0	1	1	1	53	1	1	1	0
0	0	0	1	0	0	0	1	53	1	1	1	0
0	0	1	0	0	1	1	0	53	0	1	1	0
1	1	0	1	0	1	0	0	57	0	1	1	1
0	0	0	1	0	1	1	0	58	1	1	1	1
0	0	1	0	0	0	0	0	58	0	1	0	1
1	1	1	0	0	0	0	0	61	1	1	1	1
0	0	0	1	0	0	0	0	61	0	1	0	1
1	0	0	1	0	0	0	0	68	0	0	1	0
0	0	0	1	0	1	0	0	69	0	0	1	0
1	1	1	0	0	0	0	0	69	0	0	1	1
1	0	0	1	0	1	0	0	70	0	1	1	1
1	1	1	0	0	0	0	0	70	0	0	0	0
0	0	1	0	0	0	0	0	75	0	0	0	1
1	0	1	0	0	1	1	0	75	0	0	1	1
1	1	1	0	0	1	0	0	54	0	1	1	1
0	0	0	1	0	0	0	0	40	0	1	0	1
1	0	1	0	0	1	1	0	34	1	1	1	0
0	0	0	0	1	1	0	0	35	0	1	1	1
0	1	1	0	0	1	1	1	64	0	1	0	1
0	1	0	1	0	1	0	0	69	0	1	0	0
0	0	1	0	0	1	0	0	69	0	1	1	1
0	0	1	0	0	1	0	1	73	0	0	1	1
1	1	0	1	0	1	0	1	75	0	1	1	1
0	1	0	1	0	1	0	0	24	0	1	1	1
1	0	0	0	1	1	0	0	65	0	1	1	1
0	0	1	0	0	1	0	0	41	0	1	1	1
1	1	1	0	0	0	0	0	48	0	1	0	0
1	0	0	1	0	0	0	0	52	0	1	1	0
0	0	0	1	0	0	0	0	52	0	1	0	1
1	0	0	0	1	0	0	0	53	0	1	0	1
0	1	0	1	0	1	0	0	54	0	1	1	0
0	0	1	0	0	1	0	1	61	0	1	1	1
1	0	0	1	0	0	0	0	65	0	0	1	0
0	1	0	0	1	1	0	0	69	0	1	1	0
0	1	0	1	0	0	0	1	79	1	0	1	1
0	0	1	0	0	0	0	0	74	0	0	0	1
0	0	0	1	0	1	0	1	35	0	1	1	0
0	0	1	0	0	0	0	0	35	0	1	1	1
0	0	0	1	0	1	0	0	36	1	1	1	0
0	0	1	0	0	0	0	0	37	0	1	0	0
0	0	1	0	0	1	0	0	37	0	1	1	1
0	0	1	0	0	1	0	0	38	0	1	1	1
1	1	0	1	0	0	0	1	38	0	1	0	1
1	1	1	0	0	1	0	0	39	0	1	1	1
1	0	0	1	0	1	1	0	40	1	1	1	1
0	0	1	0	0	1	1	0	40	1	1	1	1
0	0	0	1	0	0	0	0	41	1	1	1	1
1	0	1	0	0	1	0	0	41	0	1	0	1
0	0	1	0	0	1	1	0	42	0	1	1	1
1	0	0	1	0	1	0	0	42	0	1	0	1
0	1	0	0	1	0	0	0	44	0	1	0	1
0	0	0	1	0	0	0	0	46	0	1	0	1
0	0	0	1	0	0	0	0	46	0	1	0	0
1	0	0	1	0	0	0	0	46	1	1	1	1
0	0	1	0	0	0	0	0	47	0	1	1	1
1	1	1	0	0	0	0	0	47	0	1	0	1
1	0	0	1	0	1	0	0	47	0	1	1	0
0	1	1	0	0	1	1	0	47	1	1	1	1
1	1	1	0	0	1	0	0	47	0	0	1	0
0	0	0	0	1	1	0	1	48	0	1	1	0
1	0	1	0	0	1	0	0	48	0	1	1	0
0	0	1	0	0	1	0	0	48	0	1	0	1
0	0	0	1	0	1	0	0	49	0	1	1	0
1	0	1	0	0	1	0	0	49	0	1	1	1
0	1	1	0	0	1	0	0	50	0	1	1	0
0	0	1	0	0	0	0	0	50	0	1	0	0
0	0	0	0	1	1	0	0	50	0	0	1	1
1	0	1	0	0	0	0	0	53	0	1	1	1
0	1	1	0	0	0	0	0	53	0	1	0	1
1	1	1	0	0	0	0	0	53	0	1	0	1
0	0	0	1	0	1	0	0	53	0	1	0	0
0	0	0	1	0	0	0	0	53	0	1	1	0
1	1	0	1	0	1	0	1	54	0	0	1	1
1	0	1	0	0	0	0	0	55	0	1	1	0
0	0	1	0	0	1	0	0	56	0	1	1	0
0	0	1	0	0	1	0	0	56	0	1	1	0
0	0	0	1	0	1	0	0	56	0	1	0	1
0	0	0	1	0	0	0	0	56	0	1	0	1
1	0	0	1	0	1	0	0	57	1	1	1	1
0	0	1	0	0	1	0	0	57	0	0	1	0
0	0	1	0	0	1	1	0	57	0	1	1	1
1	0	1	0	0	1	0	0	58	0	1	1	1
1	0	0	1	0	1	0	0	58	0	1	1	1
0	0	0	1	0	1	0	0	58	0	1	1	0
0	0	0	0	1	1	0	0	59	1	1	1	0
1	1	0	1	0	0	0	0	60	0	1	0	1
0	1	1	0	0	1	0	0	60	0	1	0	0
1	1	0	1	0	0	0	0	60	0	1	1	1
1	0	0	1	0	0	0	0	61	0	1	1	0
1	0	1	0	0	0	0	0	61	1	1	0	0
0	0	1	0	0	0	0	0	61	0	1	0	0
1	1	0	1	0	1	0	0	61	0	1	1	1
1	1	0	1	0	1	0	0	62	0	1	1	1
1	0	0	1	0	0	0	0	62	0	0	1	1
1	1	0	1	0	1	0	0	62	0	1	1	1
0	1	0	0	1	0	0	0	63	1	0	0	1
1	0	1	0	0	1	0	0	65	0	0	1	1
1	1	0	1	0	0	0	0	65	0	0	0	1
0	0	1	0	0	1	0	0	67	0	0	1	0
1	1	1	0	0	1	0	0	67	0	0	0	0
0	0	1	0	0	1	0	0	67	0	0	1	0
1	0	0	1	0	0	0	0	68	0	0	0	1
0	0	1	0	0	0	0	0	68	0	1	0	1
0	1	0	0	1	1	0	0	68	0	0	1	0
1	0	0	1	0	1	0	1	69	1	1	1	1
1	0	0	0	1	1	0	0	70	0	1	1	1
0	0	1	0	0	0	0	1	70	0	0	0	1
1	0	0	1	0	0	0	0	71	0	1	1	1
0	0	0	1	0	0	0	0	72	0	0	0	0
1	0	0	0	1	1	1	1	72	1	1	1	0
1	1	1	0	0	1	0	0	73	0	1	0	1
1	0	0	1	0	0	0	0	74	0	0	0	0
1	0	0	1	0	1	0	0	74	0	1	1	1
1	0	0	1	0	1	1	1	76	1	1	1	0
1	0	0	1	0	0	0	0	77	1	0	1	0
1	0	0	1	0	1	0	0	78	0	1	1	1
0	0	1	0	0	0	1	1	78	0	1	0	1
1	0	0	1	0	0	0	0	78	0	1	0	0
0	0	1	0	0	0	0	0	79	0	0	0	1
1	0	1	0	0	1	1	0	47	1	1	1	1
1	1	1	0	0	0	0	0	49	0	1	0	1
0	0	0	1	0	1	0	0	39	0	1	1	0
1	0	0	1	0	1	0	0	46	0	1	1	0
1	0	1	0	0	1	0	0	51	0	0	1	0
0	1	0	0	1	0	0	0	54	0	1	0	1
1	0	0	0	1	1	0	1	66	1	0	0	0
1	0	1	0	0	1	0	0	47	0	1	1	0
1	0	0	1	0	1	0	0	45	0	1	1	0
0	0	1	0	0	1	0	0	50	0	1	1	1
1	1	0	1	0	1	0	1	50	0	1	1	1
0	0	0	1	0	1	0	0	56	1	1	1	0
1	1	0	1	0	1	0	1	73	1	0	1	1
1	0	0	0	1	1	0	0	46	0	1	1	1
0	0	0	1	0	1	0	0	41	1	1	1	1
1	1	0	0	1	1	0	0	55	0	1	0	1
0	0	1	0	0	1	0	0	56	0	1	1	0
1	0	1	0	0	1	0	0	57	0	1	1	0
1	0	1	0	0	1	1	1	69	1	0	1	0
1	0	0	1	0	1	0	0	76	1	1	1	0
1	1	1	0	0	0	0	0	60	0	1	1	1
0	0	0	1	0	1	1	1	63	1	1	1	1
1	1	1	0	0	1	1	0	71	1	0	1	1
0	0	1	0	0	1	0	0	46	0	1	1	0
1	0	1	0	0	1	0	0	38	0	1	1	1
0	0	0	0	1	1	0	1	40	0	1	1	0
1	0	1	0	0	0	0	1	41	0	1	1	0
1	0	1	0	0	1	0	0	42	1	1	1	1
0	0	0	0	1	0	0	0	44	0	1	1	0
0	0	1	0	0	1	0	0	46	0	1	1	1
1	0	1	0	0	1	1	1	46	0	1	1	0
0	0	1	0	0	1	0	0	48	0	1	0	1
0	1	0	1	0	0	0	0	50	1	1	0	1
0	0	0	1	0	1	0	0	54	0	1	1	0
0	1	1	0	0	1	0	0	54	0	1	1	1
1	1	0	1	0	1	0	0	56	1	0	1	1
0	0	1	0	0	0	0	0	58	0	1	0	1
0	0	0	0	1	0	0	0	61	0	1	0	0
0	1	1	0	0	1	0	1	62	0	1	1	1
0	1	1	0	0	0	0	0	65	0	0	0	1
1	0	1	0	0	1	0	0	73	0	1	1	1
0	0	1	0	0	1	1	0	74	0	1	1	0
1	0	0	1	0	1	0	0	74	0	1	1	0
1	0	0	1	0	0	0	0	76	0	0	0	1
0	0	0	1	0	1	1	0	76	1	1	1	1
0	0	1	0	0	1	1	1	77	1	0	1	1
0	0	1	0	0	1	0	1	71	1	1	0	1
1	1	1	0	0	1	0	0	51	0	1	1	1
1	1	0	1	0	1	0	0	49	1	1	1	1
1	0	1	0	0	1	0	0	50	0	1	1	1
0	0	1	0	0	1	0	0	63	0	1	1	1
0	0	0	1	0	1	0	0	50	1	1	1	1
0	0	1	0	0	1	0	0	52	0	1	1	1
0	0	0	1	0	1	1	0	57	1	1	1	1
1	1	0	1	0	1	0	0	60	0	1	1	1
1	1	0	1	0	1	0	0	77	0	1	1	1
1	0	1	0	0	0	0	0	35	0	1	1	1
0	0	1	0	0	0	0	0	56	0	1	1	1
0	0	0	1	0	1	0	0	73	1	0	1	0
0	0	0	0	1	0	0	0	62	0	1	0	1
1	0	0	1	0	1	0	0	50	0	1	1	1
1	0	1	0	0	1	0	0	51	0	1	1	0
1	1	0	1	0	0	0	0	52	1	1	0	0
0	0	1	0	0	1	0	1	55	1	1	1	0
1	0	1	0	0	1	0	0	65	0	1	1	1
1	0	1	0	0	1	0	0	65	0	1	1	0
1	0	0	1	0	1	0	0	75	1	0	0	1
0	0	1	0	0	0	0	0	76	1	1	0	1
1	0	0	1	0	1	0	0	54	1	1	1	1
0	0	1	0	0	0	0	0	79	0	1	0	1
1	0	1	0	0	0	0	0	23	0	1	0	0
1	1	0	1	0	0	0	0	34	0	1	0	1
0	0	1	0	0	1	0	0	37	0	1	1	1
1	0	0	0	1	0	0	0	37	0	1	1	1
1	0	0	1	0	1	0	1	37	1	1	1	1
0	1	1	0	0	1	0	0	41	0	1	1	1
1	0	1	0	0	1	1	0	41	0	1	1	1
1	1	0	1	0	1	0	0	42	0	1	0	1
0	0	0	0	1	1	0	0	42	1	1	1	1
0	0	1	0	0	0	0	0	43	0	1	0	0
1	0	1	0	0	0	0	0	45	0	1	0	1
0	1	0	1	0	0	0	0	45	0	1	1	0
1	0	1	0	0	1	0	0	45	0	1	1	0
0	0	1	0	0	1	0	0	46	0	1	1	1
1	0	0	1	0	0	0	0	46	0	1	0	0
1	0	0	0	1	1	0	0	47	0	1	1	1
0	0	1	0	0	0	0	0	48	0	1	0	0
1	0	0	0	1	0	0	0	48	0	1	1	0
0	1	1	0	0	1	0	0	48	0	1	1	0
1	0	1	0	0	0	0	0	49	0	0	0	1
0	0	0	1	0	0	0	0	50	0	1	0	1
0	0	0	1	0	1	1	0	50	1	1	1	1
1	0	0	0	1	1	0	0	50	0	1	1	1
0	0	1	0	0	1	0	0	50	0	1	1	0
1	0	0	1	0	1	1	0	51	0	1	1	0
1	0	1	0	0	0	0	0	52	0	0	1	1
1	0	1	0	0	1	0	1	53	1	1	1	1
1	0	1	0	0	1	0	0	53	0	1	1	1
1	0	0	0	1	0	0	1	54	0	0	0	1
0	0	1	0	0	0	1	0	55	0	1	1	1
1	0	0	1	0	0	0	0	55	0	1	1	0
0	1	0	0	1	1	0	1	55	0	1	1	1
1	0	1	0	0	1	0	0	55	0	1	0	1
1	1	0	0	1	0	0	0	55	0	1	0	1
0	0	1	0	0	1	0	0	56	0	1	1	0
1	0	0	1	0	0	0	1	56	1	1	1	0
1	0	0	0	1	1	0	0	56	0	1	1	1
1	0	0	1	0	0	0	0	56	0	1	0	1
0	0	1	0	0	1	0	0	58	0	1	1	0
0	1	1	0	0	1	0	0	59	0	1	1	1
1	0	1	0	0	1	0	0	59	0	1	0	1
0	0	0	1	0	1	1	0	59	0	1	1	1
1	0	1	0	0	1	0	1	59	0	1	1	1
0	1	1	0	0	0	0	0	61	0	1	1	1
1	1	1	0	0	0	0	1	62	0	1	1	1
1	1	1	0	0	1	0	0	63	0	0	1	1
1	0	1	0	0	1	0	0	63	0	0	1	1
1	1	1	0	0	0	0	0	63	0	1	1	1
0	0	1	0	0	1	0	0	63	0	1	1	0
0	1	0	1	0	1	0	0	64	1	1	1	1
0	0	0	1	0	1	1	0	64	1	1	1	0
1	0	1	0	0	1	0	0	64	0	0	1	0
0	1	0	1	0	1	1	0	64	1	0	1	1
1	1	1	0	0	1	0	1	64	0	1	1	1
1	0	1	0	0	1	1	0	65	1	1	1	1
1	0	1	0	0	0	0	0	65	0	1	0	1
1	1	0	1	0	0	0	0	66	0	0	0	1
0	0	0	1	0	1	0	0	66	0	1	0	0
0	0	1	0	0	0	0	0	66	0	0	0	1
1	1	0	1	0	0	0	0	66	1	0	1	1
1	1	0	1	0	1	0	0	66	0	1	0	1
1	0	1	0	0	0	0	0	67	0	0	1	1
1	0	1	0	0	1	0	0	67	0	1	0	1
0	1	0	1	0	0	0	1	68	0	1	1	0
1	0	0	1	0	1	0	0	69	0	0	1	1
1	1	1	0	0	1	0	0	71	0	1	1	0
0	0	1	0	0	0	0	0	72	0	1	0	1
0	0	1	0	0	0	0	0	72	0	0	1	1
1	1	0	1	0	1	0	0	73	0	1	1	0
0	0	1	0	0	0	0	0	79	0	1	0	0
1	1	0	0	1	0	1	0	79	0	1	0	1
0	0	1	0	0	1	0	0	35	0	1	0	1
0	1	0	1	0	1	0	0	52	1	1	1	0
1	0	0	0	1	0	0	0	39	0	1	1	0
0	1	1	0	0	0	0	0	51	0	1	0	1
1	0	1	0	0	0	0	0	48	0	1	0	1
0	0	0	1	0	1	0	0	53	0	1	1	1
0	0	1	0	0	0	0	0	46	0	1	0	1
0	0	1	0	0	1	0	0	54	0	1	1	0
1	0	1	0	0	0	0	0	64	0	1	0	1
0	0	1	0	0	0	0	0	41	0	1	1	1
1	0	0	1	0	0	0	1	71	1	0	1	1
0	1	1	0	0	1	0	0	49	0	1	1	1
1	1	1	0	0	1	0	0	67	0	0	1	1
1	0	1	0	0	1	0	1	73	0	0	1	0
1	1	1	0	0	1	0	0	51	0	1	1	0
0	0	0	0	1	1	0	0	35	0	1	1	0
0	1	0	1	0	0	0	0	43	0	1	1	1
1	0	0	1	0	1	0	0	44	1	0	1	1
1	1	0	1	0	1	0	0	46	0	1	1	1
0	0	0	0	1	0	0	0	46	0	1	1	0
0	0	1	0	0	0	0	0	46	0	1	0	1
0	0	0	0	1	0	0	0	46	0	1	1	0
0	0	1	0	0	1	0	0	47	0	1	1	1
1	0	1	0	0	1	0	1	49	0	1	1	0
1	1	0	1	0	1	0	0	51	1	1	1	1
0	0	1	0	0	1	0	0	54	0	1	0	1
1	0	0	1	0	0	0	0	54	0	1	0	1
1	1	0	1	0	1	0	0	55	1	0	1	0
0	0	1	0	0	1	0	0	55	0	1	1	1
1	1	0	1	0	1	0	0	56	0	1	1	1
1	1	1	0	0	0	0	0	56	0	1	1	1
1	0	0	0	1	0	0	0	59	0	1	0	1
1	1	1	0	0	0	0	1	59	0	0	1	0
1	0	0	0	1	0	0	0	60	0	1	0	1
1	0	1	0	0	1	0	0	61	1	1	1	1
1	1	0	1	0	0	0	0	64	1	1	0	1
0	1	1	0	0	1	0	1	66	0	1	1	1
1	0	1	0	0	0	0	0	68	0	0	0	1
1	0	0	1	0	1	0	0	69	1	0	1	1
1	0	0	1	0	0	0	0	73	0	0	0	0
1	0	0	1	0	1	1	1	74	1	1	1	1
1	0	0	1	0	1	0	1	79	1	1	1	0
0	1	1	0	0	1	0	0	57	0	1	1	1
1	0	0	1	0	0	0	1	49	0	1	0	1
1	1	0	1	0	1	0	0	70	1	0	1	1
1	0	0	0	1	1	0	0	46	0	1	1	1
1	1	0	0	0	0	0	0	52	0	1	1	1
1	0	1	0	0	0	0	0	53	0	1	0	1
1	1	0	1	0	1	0	0	55	1	0	1	0
0	0	0	0	1	0	0	0	66	0	1	0	1
0	0	0	1	0	1	0	1	74	1	1	1	1
1	0	0	0	1	1	0	0	51	0	1	1	1
0	0	1	0	0	1	1	0	43	0	0	1	0
1	1	0	1	0	1	0	0	46	0	1	1	0
0	0	1	0	0	1	0	0	48	0	1	1	1
1	1	1	0	0	0	0	0	46	0	1	0	1
0	0	1	0	0	1	1	0	48	1	1	1	1
0	1	1	0	0	0	0	0	40	0	1	0	0
0	0	1	0	0	1	0	0	40	0	1	1	0
0	1	1	0	0	0	0	0	40	0	1	0	0
1	0	0	1	0	1	0	0	41	1	1	1	1
0	1	0	0	1	0	1	0	42	0	1	1	1
1	0	0	1	0	0	0	0	43	0	1	1	1
1	0	0	1	0	1	0	0	45	1	0	1	1
0	1	0	1	0	0	0	0	45	0	1	0	1
1	0	1	0	0	1	0	0	45	0	1	0	0
0	0	1	0	0	1	0	0	46	0	1	0	0
0	1	0	1	0	1	1	0	47	1	1	1	1
1	1	0	1	0	1	0	1	48	1	0	1	0
1	0	0	1	0	1	0	0	48	0	1	1	1
1	0	1	0	0	0	0	0	50	0	1	0	1
1	0	1	0	0	1	1	0	50	1	1	1	1
1	1	0	1	0	0	0	0	51	0	0	0	1
1	1	1	0	0	0	0	0	52	0	1	0	1
1	0	1	0	0	1	1	0	55	0	1	1	1
0	0	1	0	0	1	0	1	56	0	1	1	1
1	0	1	0	0	0	0	0	57	0	1	1	0
1	0	0	1	0	1	0	1	58	1	1	0	1
1	0	1	0	0	0	0	0	58	0	1	1	1
0	0	0	1	0	1	0	0	58	0	1	1	0
1	0	1	0	0	1	0	0	62	0	1	0	0
0	0	1	0	0	1	0	0	62	0	0	1	1
0	0	0	0	1	1	1	0	63	1	1	1	0
0	0	1	0	0	1	0	0	63	1	1	1	1
1	1	1	0	0	1	0	0	66	0	1	1	1
1	0	0	1	0	1	0	0	66	0	1	0	1
1	1	1	0	0	0	0	0	68	0	0	1	1
0	1	0	1	0	1	0	1	70	0	1	1	1
0	0	0	0	1	0	0	0	72	0	1	1	0
0	0	1	0	0	0	0	0	73	0	1	1	1
0	1	0	0	1	0	0	0	73	0	1	1	1
1	0	0	1	0	1	0	0	74	0	0	1	0
0	0	0	1	0	0	0	0	74	0	1	0	0
1	0	1	0	0	1	0	0	74	0	1	1	0
1	1	1	0	0	0	0	0	75	0	1	0	1
1	0	0	1	0	0	1	0	75	1	0	1	1
0	0	0	1	0	1	0	0	75	1	0	1	0
1	1	1	0	0	0	0	0	76	0	0	0	1
0	0	0	1	0	1	0	0	49	0	1	1	1
1	0	0	1	0	1	0	0	43	0	1	1	1
0	0	1	0	0	1	0	0	44	0	1	1	1
0	0	0	0	1	1	0	0	49	0	1	1	1
1	1	0	1	0	1	0	0	41	0	1	1	0
1	0	0	1	0	1	1	0	42	1	1	1	1
1	0	1	0	0	1	0	0	54	0	1	0	1
0	0	1	0	0	1	0	0	69	1	0	1	0
0	0	1	0	0	0	0	0	79	0	1	1	1
0	1	0	1	0	1	0	0	70	0	0	1	0
0	0	0	1	0	1	1	0	56	1	1	1	1
0	0	0	1	0	1	0	1	71	0	1	1	1
0	1	1	0	0	1	0	1	74	0	1	0	0
0	0	1	0	0	1	0	1	77	0	1	1	0
0	0	0	1	0	1	0	0	32	1	1	1	0
0	0	0	1	0	1	0	0	33	0	1	1	1
1	0	0	0	1	1	0	0	38	1	1	1	0
1	0	0	1	0	0	0	0	44	0	1	0	0
1	1	1	0	0	0	0	0	50	0	1	0	1
1	0	0	1	0	0	0	0	52	0	1	0	1
1	0	0	1	0	1	0	0	54	0	1	1	0
0	1	0	1	0	0	0	0	59	0	1	0	0
1	1	0	1	0	1	0	0	60	1	0	1	1
0	0	0	1	0	1	0	0	60	0	1	0	1
1	1	1	0	0	1	0	1	62	0	1	1	0
0	0	1	0	0	0	0	0	63	0	1	0	1
1	0	1	0	0	0	0	0	63	0	1	0	1
1	0	0	1	0	1	1	0	64	1	1	1	1
1	1	1	0	0	0	0	0	66	0	0	1	1
1	0	0	0	1	1	0	0	71	0	1	1	0
1	0	1	0	0	1	0	0	72	0	1	1	1
1	0	0	1	0	1	0	0	74	1	0	1	0
0	0	1	0	0	0	0	0	74	0	1	1	1
0	0	1	0	0	1	0	0	79	0	1	1	0
0	0	1	0	0	1	0	1	67	0	1	1	0
0	0	1	0	0	0	0	0	46	0	1	1	1
0	0	0	1	0	1	0	0	47	1	1	1	1
1	1	0	1	0	1	0	0	63	0	1	1	0
1	1	0	1	0	1	0	0	54	0	1	0	0
0	1	0	1	0	1	1	0	48	1	1	1	0
0	0	1	0	0	0	0	0	38	0	1	1	1
1	0	1	0	0	1	0	0	70	0	1	1	1
0	0	0	1	0	0	0	0	48	0	1	0	0
1	0	0	0	1	0	0	0	54	0	1	1	0
1	0	1	0	0	0	0	0	37	0	1	0	1
0	0	0	0	1	1	1	0	40	0	1	1	0
1	0	0	1	0	1	0	1	45	0	1	1	1
0	0	1	0	0	1	0	1	46	0	0	1	1
0	0	0	1	0	1	0	0	46	0	1	1	0
0	0	0	1	0	1	0	0	46	0	1	1	0
1	0	1	0	0	0	0	0	47	0	1	1	1
1	0	0	1	0	1	0	1	48	0	1	1	1
0	1	1	0	0	1	0	0	49	0	1	1	1
0	1	0	1	0	1	1	0	49	1	0	1	1
1	0	0	1	0	0	0	0	51	0	0	0	0
1	0	1	0	0	0	0	0	52	0	0	1	1
0	0	0	1	0	1	0	0	53	0	1	1	1
1	0	1	0	0	0	0	0	54	0	1	0	1
1	0	0	1	0	0	0	0	55	0	1	0	0
0	1	1	0	0	1	0	0	57	0	1	1	1
0	0	1	0	0	1	0	1	58	0	1	1	0
0	0	1	0	0	0	0	0	62	0	0	0	0
0	1	1	0	0	1	0	0	62	0	1	1	0
0	0	1	0	0	1	0	0	65	0	0	1	1
0	0	0	1	0	1	0	0	67	0	1	1	0
0	0	0	1	0	0	0	0	68	0	1	0	1
1	0	1	0	0	1	0	0	73	0	0	1	0
1	1	0	1	0	0	0	0	74	0	0	0	1
1	0	0	1	0	1	1	0	75	0	1	1	1
0	0	0	1	0	0	0	0	76	1	0	1	1
1	1	0	1	0	0	0	0	76	0	0	1	0
1	0	0	1	0	0	0	0	77	0	0	0	1
0	0	0	1	0	0	0	0	52	0	1	0	1
0	1	0	1	0	1	0	0	54	0	1	1	1
1	0	0	1	0	0	0	0	55	1	0	0	1
1	1	0	0	1	0	0	0	64	1	1	0	0
0	0	1	0	0	1	0	1	43	0	1	1	0
0	0	0	1	0	1	0	0	53	0	1	0	1
1	0	1	0	0	0	0	0	56	0	1	1	0
1	0	0	1	0	1	0	0	75	0	1	1	1
0	0	0	1	0	1	1	0	57	1	1	1	0
1	0	0	1	0	1	0	0	72	1	0	1	0
0	0	0	0	1	1	0	0	45	0	1	1	1
1	1	0	1	0	1	0	1	51	1	1	1	1
0	0	0	1	0	0	0	0	55	0	1	1	1
0	0	0	1	0	0	0	0	65	1	0	1	1
0	0	1	0	0	0	0	0	74	0	1	1	1
1	0	1	0	0	1	0	0	77	0	0	1	1
0	0	1	0	0	0	0	0	46	0	1	1	1
0	0	1	0	0	1	0	0	59	0	0	1	0
0	0	1	0	0	1	0	0	44	0	1	1	1
1	1	0	0	1	1	0	1	48	0	1	1	0
0	1	0	1	0	1	0	0	49	0	1	1	0
0	0	1	0	0	1	0	0	59	0	1	1	1
1	0	1	0	0	1	0	0	62	0	1	1	0
1	1	0	0	1	0	0	0	63	0	0	1	1
0	0	0	0	1	0	0	0	64	0	1	0	0
0	1	1	0	0	1	0	1	66	0	1	1	1
1	1	1	0	0	1	0	0	67	0	0	1	1
0	1	0	1	0	1	0	0	78	1	0	1	1
0	0	1	0	0	1	0	1	44	1	1	1	1
1	0	1	0	0	0	0	0	67	0	0	0	0
0	0	1	0	0	0	0	0	36	0	1	0	1
0	0	1	0	0	1	1	1	42	0	1	1	1
0	0	0	1	0	1	0	0	52	0	1	1	1
0	0	0	1	0	0	0	0	54	0	1	1	1
0	0	1	0	0	1	0	0	61	0	1	1	1
1	0	0	1	0	1	0	0	65	0	1	1	1
0	0	0	1	0	0	0	1	68	0	1	1	1
1	0	0	1	0	0	0	0	57	0	1	0	1
1	1	0	1	0	1	0	1	58	1	1	1	1
1	0	0	0	1	0	0	0	43	0	1	1	1
0	0	0	1	0	1	0	0	57	1	1	1	1
1	0	1	0	0	0	0	0	58	0	1	0	1
0	0	1	0	0	0	0	0	60	0	1	0	0
0	1	1	0	0	0	0	0	39	0	1	0	1
1	0	1	0	0	0	0	0	40	0	1	0	1
0	0	1	0	0	0	0	0	40	0	0	0	0
0	0	0	1	0	1	0	0	41	0	1	1	0
0	0	1	0	0	0	0	0	41	0	1	1	1
0	0	1	0	0	1	0	0	43	0	0	1	0
0	0	0	1	0	1	0	0	45	0	0	0	0
0	0	0	1	0	1	1	0	46	1	1	1	0
0	1	1	0	0	0	0	0	47	0	0	1	0
1	1	0	1	0	0	0	0	52	0	1	0	1
1	0	0	1	0	1	0	0	55	0	1	0	1
0	0	0	0	1	1	0	0	55	0	1	1	0
0	1	1	0	0	0	0	0	56	0	1	1	1
0	0	1	0	0	1	0	0	57	0	1	1	0
0	0	0	0	1	1	0	0	58	1	1	1	1
1	0	0	1	0	1	0	0	58	0	1	1	0
0	0	1	0	0	0	0	0	59	0	1	0	0
0	1	1	0	0	1	0	1	60	0	1	1	1
1	0	1	0	0	1	0	0	63	0	1	1	0
0	0	1	0	0	1	0	0	64	0	1	1	1
1	0	0	0	1	0	0	0	64	0	1	0	1
0	0	0	0	1	1	1	0	66	1	1	1	1
0	0	0	0	1	1	1	0	67	0	1	1	0
1	0	1	0	0	1	0	0	72	0	0	1	1
0	0	1	0	0	0	0	0	61	0	1	0	1
0	1	1	0	0	1	0	0	54	0	1	1	1
0	0	0	1	0	1	0	1	60	1	0	1	0
1	0	0	1	0	1	0	0	61	0	1	1	1
1	0	1	0	0	1	0	0	67	0	1	1	1
1	0	1	0	0	1	0	0	67	0	1	1	1
1	1	1	0	0	1	0	0	54	0	1	1	0
0	1	1	0	0	1	0	0	59	0	1	0	1
0	0	0	1	0	1	1	1	59	1	1	1	0
0	0	1	0	0	1	0	0	34	0	0	1	1
0	0	1	0	0	0	0	0	52	0	1	0	1
0	0	1	0	0	0	0	0	50	0	1	1	0
1	0	1	0	0	1	0	0	80	0	1	1	1
1	0	1	0	0	0	0	0	34	0	1	0	0
1	0	1	0	0	0	0	0	36	0	1	0	1
0	0	1	0	0	1	0	0	37	0	1	1	1
0	0	1	0	0	0	0	0	41	0	1	1	1
0	0	1	0	0	0	0	0	43	0	1	0	1
1	0	1	0	0	1	0	0	46	0	1	1	1
0	0	0	1	0	1	0	0	48	0	1	1	0
0	0	0	1	0	1	0	0	48	1	1	1	1
0	0	0	1	0	1	1	0	50	1	1	1	1
1	1	0	1	0	1	0	0	51	1	1	1	0
0	1	0	1	0	1	0	0	53	1	1	1	0
0	0	0	0	1	0	1	0	55	1	1	1	0
0	0	1	0	0	1	0	1	55	0	1	1	1
1	0	0	1	0	1	0	0	55	0	1	1	0
1	0	1	0	0	1	0	1	55	0	1	1	1
1	0	0	1	0	1	0	0	59	0	1	1	1
1	0	1	0	0	0	0	0	60	0	0	0	1
0	0	1	0	0	0	0	0	62	0	1	1	1
0	0	0	1	0	1	0	0	63	0	1	1	1
1	1	1	0	0	0	0	0	63	0	1	0	1
1	0	0	1	0	1	0	0	64	1	0	1	1
0	1	0	1	0	0	0	0	68	0	1	0	1
1	0	1	0	0	1	0	0	72	0	1	1	1
0	0	0	1	0	0	0	0	74	0	1	0	1
1	1	0	0	1	0	0	0	77	0	0	0	1
0	0	0	1	0	1	0	0	77	0	0	1	1
1	1	0	0	1	0	0	0	77	0	0	0	0
1	0	1	0	0	0	0	1	78	0	1	1	0
0	0	0	1	0	1	0	0	78	0	1	1	1
1	0	1	0	0	0	0	0	66	0	1	1	1
0	0	0	1	0	0	0	0	72	1	1	1	0
1	0	0	1	0	0	0	0	41	0	0	1	0
1	0	1	0	0	0	0	0	68	0	1	0	1
0	0	0	1	0	1	0	1	73	0	1	1	1
0	0	1	0	0	1	0	0	58	0	0	1	1
1	0	0	1	0	0	0	0	74	0	0	0	1
0	0	1	0	0	1	0	0	37	0	1	1	1
1	0	1	0	0	0	0	0	39	0	1	0	0
0	0	1	0	0	0	0	0	44	0	1	0	1
0	1	1	0	0	1	0	0	52	0	1	0	1
1	0	0	1	0	1	0	0	62	0	1	1	1
1	0	0	1	0	0	0	1	65	0	1	0	1
1	1	0	1	0	0	0	0	62	0	1	0	1
1	0	1	0	0	0	0	0	65	0	1	0	1
0	0	0	1	0	1	0	1	72	1	0	1	1
0	0	1	0	0	1	0	0	36	0	1	0	0
0	0	1	0	0	1	0	0	39	0	1	1	1
0	0	1	0	0	1	0	1	41	0	1	1	0
1	0	1	0	0	1	0	0	42	0	1	0	1
0	0	0	1	0	1	0	0	44	0	1	0	1
0	0	1	0	0	1	0	0	50	0	1	1	0
1	0	0	1	0	1	0	0	53	0	1	1	0
1	1	1	0	0	0	0	0	53	0	0	0	1
0	0	0	1	0	1	0	0	53	1	1	1	0
0	0	0	1	0	0	0	0	54	0	1	0	1
1	0	0	1	0	1	0	1	55	0	1	1	1
1	0	0	1	0	1	0	1	56	0	1	1	1
1	0	1	0	0	1	0	0	59	0	1	1	0
0	1	1	0	0	0	0	0	59	0	1	1	1
0	0	0	1	0	1	0	1	65	0	1	1	1
1	0	0	1	0	1	0	0	66	0	1	1	0
1	1	0	1	0	0	0	0	66	0	0	0	1
0	0	1	0	0	1	0	0	70	1	0	1	1
1	0	0	1	0	1	1	0	70	0	1	0	0
1	1	0	0	1	1	0	0	74	1	1	1	1
0	0	1	0	0	0	0	0	74	0	1	0	1
1	0	0	1	0	1	0	0	78	0	0	1	1
1	0	1	0	0	1	0	0	70	0	1	1	1
0	1	0	0	1	1	0	1	57	0	1	1	0
1	1	1	0	0	0	0	0	56	0	0	1	1
1	1	0	1	0	0	0	0	62	0	0	1	1
1	1	1	0	0	0	0	0	63	0	1	0	1
0	1	0	0	1	0	0	0	64	0	0	1	1
0	0	1	0	0	1	0	0	68	0	1	1	1
0	0	1	0	0	1	0	0	44	0	1	1	0
1	1	1	0	0	0	0	0	45	0	0	1	1
1	0	0	1	0	1	0	0	52	0	1	1	1
1	0	0	0	1	1	0	0	63	0	1	1	1
1	1	0	1	0	0	0	0	72	0	1	1	0
1	0	0	0	0	0	0	0	73	0	0	1	1
1	0	1	0	0	1	0	1	74	0	0	1	0
1	0	0	1	0	1	0	0	51	1	1	1	1
1	0	0	1	0	1	1	0	38	0	1	1	1
0	0	1	0	0	0	0	0	44	0	1	0	0
1	1	0	0	1	1	0	0	50	1	1	1	1
1	0	1	0	0	0	0	0	52	0	1	0	1
1	1	1	0	0	0	0	0	55	0	0	0	0
1	0	0	1	0	1	0	0	56	1	1	1	0
1	0	1	0	0	1	0	0	56	0	1	1	1
0	0	0	0	1	1	1	0	57	0	1	1	1
1	0	1	0	0	0	0	0	58	0	1	0	1
0	1	1	0	0	0	0	0	60	0	1	1	1
0	1	0	1	0	1	0	1	63	0	1	1	1
0	0	1	0	0	0	0	0	63	0	0	0	1
1	0	0	0	1	1	0	0	63	1	1	1	1
0	0	0	1	0	1	0	1	70	1	0	1	0
1	0	1	0	0	0	0	0	76	0	0	0	0
1	1	0	1	0	1	0	0	77	0	0	1	0
1	1	1	0	0	0	0	0	77	0	0	0	1
1	0	0	1	0	0	0	0	40	0	1	0	1
0	0	1	0	0	1	0	0	44	0	1	1	0
1	0	1	0	0	0	0	0	47	0	1	1	0
0	0	0	1	0	1	0	0	56	0	1	1	0
1	1	1	0	0	0	0	0	58	0	1	0	0
1	0	0	0	1	0	0	0	59	0	1	0	0
1	0	0	1	0	0	0	0	59	1	1	0	0
0	0	1	0	0	1	0	0	60	0	1	0	0
1	0	1	1	0	1	0	0	64	0	1	1	0
0	0	0	1	0	1	0	0	64	0	0	1	0
0	0	1	0	0	1	0	0	67	0	1	1	0
1	0	0	0	1	1	0	0	52	1	1	1	0
0	1	1	0	0	1	1	0	63	0	0	1	1
0	1	0	0	1	1	0	0	37	0	1	0	0
0	0	0	0	1	1	0	0	39	0	1	1	0
1	1	1	0	0	1	0	0	40	0	1	0	1
0	0	1	0	0	0	0	0	40	0	1	0	0
1	0	0	0	1	0	0	0	42	0	1	0	1
0	1	0	1	0	1	0	0	42	1	1	1	0
0	0	0	1	0	0	0	0	49	0	1	0	1
0	0	0	1	0	0	0	0	50	0	1	0	0
0	0	1	0	0	1	0	0	50	0	1	1	1
0	0	1	0	0	0	0	0	51	0	1	0	1
1	0	0	0	1	1	0	0	51	0	1	1	0
0	0	0	1	0	1	0	0	52	0	1	1	0
1	1	1	0	0	0	0	0	52	0	1	0	1
0	1	0	1	0	1	1	0	53	1	1	1	0
0	0	0	1	0	0	0	0	54	0	1	0	0
1	0	1	0	0	0	0	0	55	0	1	0	1
0	0	0	0	1	1	0	0	55	0	0	1	0
1	1	0	1	0	1	1	0	56	0	1	1	1
1	0	0	1	0	1	0	1	57	0	1	1	1
1	1	0	1	0	1	0	0	58	0	1	1	1
1	0	0	1	0	1	0	1	60	0	1	1	0
1	0	0	1	0	0	1	0	61	1	0	1	0
1	1	1	0	0	1	0	0	64	0	1	1	1
1	1	0	1	0	0	0	0	65	1	0	1	0
1	0	0	0	1	0	0	0	65	0	1	0	0
1	0	1	0	0	0	0	0	66	0	1	1	0
1	0	0	1	0	1	0	0	68	0	1	1	1
0	0	1	0	0	0	0	0	69	0	1	0	0
1	1	0	1	0	1	0	0	69	0	1	1	1
1	0	1	0	0	0	0	0	70	0	1	1	0
1	1	1	0	0	0	0	0	71	0	1	1	1
1	0	0	1	0	1	0	0	72	0	1	0	0
1	0	1	0	0	1	0	0	73	0	1	1	0
0	0	1	0	0	0	0	0	75	0	1	0	0
1	0	1	0	0	1	0	0	75	0	1	1	0
0	0	1	0	0	0	0	0	76	0	1	1	0
1	1	0	0	1	1	0	0	70	0	1	1	0
0	0	0	1	0	1	1	0	43	0	1	1	1
1	1	0	1	0	0	0	0	70	0	1	0	0
0	0	1	0	0	1	0	0	50	0	1	1	0
0	0	1	0	0	1	1	0	60	1	1	1	1
1	1	0	1	0	1	0	0	37	0	1	1	0
0	0	0	0	1	1	0	0	37	0	1	1	0
0	0	0	1	0	0	0	0	38	1	1	1	1
0	0	0	1	0	0	0	0	40	0	1	0	0
0	0	1	0	0	0	0	0	40	0	1	0	1
0	0	0	0	1	1	0	0	41	0	1	1	1
0	0	0	1	0	1	0	0	42	0	1	1	0
1	0	0	1	0	1	0	0	42	0	1	1	1
0	0	0	1	0	0	1	0	43	0	0	1	0
1	1	1	0	0	0	0	1	44	0	1	1	1
0	0	0	1	0	1	0	0	44	1	1	1	0
1	0	0	1	0	1	0	0	44	0	1	1	0
1	1	0	1	0	1	0	1	44	0	1	1	1
0	1	0	1	0	1	0	0	45	0	1	1	0
0	0	0	0	1	1	0	0	46	0	1	1	1
1	0	1	0	0	1	0	0	47	0	1	1	1
0	0	1	0	0	1	0	0	47	0	1	1	0
0	0	0	1	0	1	0	0	48	0	1	1	0
1	0	0	0	1	1	0	0	49	0	1	1	0
0	0	1	0	0	1	0	0	50	0	1	1	1
1	0	0	1	0	1	0	0	50	0	1	1	1
1	1	0	1	0	0	0	0	50	0	1	0	0
1	0	0	1	0	1	0	0	50	1	0	1	0
0	0	0	1	0	0	0	0	51	0	1	0	0
1	0	1	0	0	1	0	0	51	0	0	1	0
0	0	0	1	0	0	0	0	51	0	1	1	0
0	0	0	1	0	1	1	0	52	1	1	1	0
0	0	1	0	0	0	0	0	53	0	1	0	0
1	0	0	1	0	1	1	0	53	1	1	1	0
1	1	0	1	0	0	0	0	54	0	1	1	0
1	1	0	1	0	1	0	0	54	0	1	1	0
0	1	0	1	0	1	0	0	56	0	1	1	0
1	0	0	1	0	0	0	0	56	0	1	0	0
1	0	0	1	0	1	0	0	56	0	1	1	0
1	0	0	1	0	1	0	0	56	0	1	1	0
1	1	1	0	0	0	0	0	57	0	1	0	0
0	0	1	0	0	0	0	0	57	0	1	0	1
1	0	0	1	0	1	0	0	58	0	1	1	0
0	0	0	0	1	0	0	0	59	0	1	0	0
1	1	0	1	0	1	0	0	59	0	1	1	1
0	0	1	0	0	1	0	0	60	0	1	0	1
1	0	0	1	0	0	0	0	61	0	1	1	0
1	0	1	0	0	1	0	0	61	0	1	1	0
0	0	1	0	0	0	0	0	63	0	1	1	1
0	0	0	1	0	1	1	0	64	1	1	1	0
0	1	1	0	0	1	1	0	65	0	0	1	0
0	0	1	0	0	0	0	0	66	0	0	1	1
1	0	0	0	1	1	0	0	67	1	0	1	1
0	0	1	0	0	1	0	0	68	0	1	1	0
1	0	0	1	0	0	0	0	70	0	1	0	0
1	0	0	1	0	1	1	0	70	1	0	1	0
1	0	1	0	0	1	0	1	71	0	0	1	0
1	0	0	0	1	1	1	0	73	0	1	1	0
1	0	0	1	0	1	1	0	74	1	0	1	1
1	0	0	0	1	1	0	0	60	0	0	1	0
1	0	0	0	1	0	0	0	64	0	0	0	1
1	0	1	0	0	0	0	0	78	0	1	1	1
0	0	0	0	1	1	0	0	25	0	1	1	0
0	0	1	0	0	1	0	0	44	0	1	1	0
1	0	1	0	0	1	0	0	51	0	1	1	0
0	1	0	0	1	1	0	0	52	0	1	1	1
0	0	1	0	0	1	0	0	53	0	1	1	0
0	0	1	0	0	1	0	0	64	0	1	1	1
1	0	0	1	0	1	1	0	66	0	1	1	0
1	0	0	0	1	1	0	0	68	1	1	1	1
0	0	1	0	0	0	0	0	68	0	1	0	1
0	1	0	0	1	1	0	0	43	0	1	0	0
1	1	1	0	0	1	1	0	62	0	1	1	0
1	0	1	0	0	1	0	0	35	0	1	1	0
1	0	1	0	0	1	0	0	36	0	1	1	0
1	0	0	1	0	1	0	0	37	0	1	0	1
1	0	0	0	1	0	0	0	39	0	1	0	1
1	0	0	0	1	1	0	0	41	0	1	1	0
0	0	1	0	0	1	0	1	43	0	0	1	1
0	1	0	1	0	0	0	0	44	0	1	0	0
1	0	1	0	0	0	0	0	46	0	1	1	0
1	1	1	0	0	0	0	0	46	0	1	0	0
0	1	0	0	1	0	0	0	46	0	1	0	0
1	0	1	0	0	1	0	0	46	0	1	1	1
1	0	1	0	0	1	0	0	47	0	1	1	1
1	0	1	0	0	0	0	0	48	0	1	1	1
0	0	1	0	0	1	0	0	49	0	1	1	1
0	0	0	1	0	1	0	0	49	1	1	1	0
0	1	0	1	0	0	0	0	49	0	0	1	0
1	1	0	1	0	1	0	0	49	1	1	1	0
0	0	0	1	0	1	1	0	50	1	1	1	0
0	0	0	0	1	0	0	0	50	0	1	0	0
1	0	1	0	0	0	0	0	50	0	1	0	1
0	1	0	1	0	0	0	0	51	0	1	0	1
1	0	1	0	0	0	0	0	51	0	1	0	0
0	0	0	1	0	0	0	0	51	0	1	0	1
0	0	0	1	0	1	0	0	52	1	1	1	0
1	1	0	1	0	0	0	0	54	0	1	1	0
1	0	0	1	0	1	0	0	54	0	1	1	1
0	0	0	1	0	1	0	0	54	0	1	0	0
0	0	1	0	0	1	0	0	54	0	1	1	0
0	0	0	1	0	0	0	0	55	0	1	0	0
1	0	0	1	0	0	0	0	55	0	1	1	0
1	0	0	1	0	1	1	0	55	1	1	1	0
0	0	0	0	1	0	0	0	55	0	1	0	0
0	0	1	0	0	1	0	0	55	0	1	1	0
1	0	0	0	1	1	1	0	56	1	1	1	1
0	1	0	1	0	1	0	0	56	0	0	1	0
1	0	1	0	0	1	0	0	56	0	1	1	1
1	1	0	1	0	1	0	0	57	0	1	1	0
0	0	0	1	0	1	0	0	57	0	1	1	1
1	1	1	0	0	0	0	0	57	0	1	0	1
1	1	0	1	0	1	0	0	57	0	1	1	1
0	1	0	1	0	0	0	0	58	0	1	0	0
1	0	0	0	1	0	0	0	58	0	1	0	0
0	0	1	0	0	1	0	0	58	0	1	1	0
0	0	0	1	0	1	0	0	59	0	1	1	1
1	0	1	0	0	0	0	0	59	0	1	1	1
1	1	0	1	0	1	0	0	59	0	1	1	0
0	0	0	0	1	0	0	0	60	0	1	1	0
0	0	1	0	0	1	0	1	61	0	0	1	1
0	1	0	1	0	0	0	0	61	0	1	0	1
1	0	1	0	0	1	0	0	61	0	1	1	1
0	1	0	0	1	1	0	0	61	0	1	1	0
1	0	0	0	1	1	1	0	61	1	1	0	0
0	0	0	0	1	0	0	0	62	0	1	1	1
1	1	0	1	0	1	1	0	62	0	1	1	0
1	0	1	0	0	1	0	0	63	0	1	1	0
0	0	1	0	0	0	0	0	64	0	1	1	1
0	0	1	0	0	1	0	0	65	0	1	1	1
1	1	0	1	0	0	0	0	65	0	1	0	0
1	1	1	0	0	0	1	0	67	0	1	0	0
1	1	1	0	0	1	0	0	68	1	1	1	0
0	0	0	1	0	1	0	0	68	1	1	1	0
1	0	0	1	0	1	0	0	68	0	0	1	0
1	1	1	0	0	0	0	0	69	0	1	1	0
1	0	0	1	0	0	0	0	71	1	0	1	1
1	1	1	0	0	1	0	1	72	0	0	1	0
0	0	0	1	0	1	0	0	72	0	1	1	1
1	0	1	0	0	1	0	1	72	0	1	1	1
1	0	1	0	0	1	0	0	72	0	0	1	1
1	0	0	1	0	1	1	0	72	0	1	1	0
0	1	1	0	0	0	0	0	75	0	0	0	0
0	1	0	1	0	0	0	0	76	0	1	0	1
1	1	1	0	0	1	0	0	48	0	1	0	0
1	0	1	0	0	1	0	0	62	0	1	1	1
1	0	1	0	0	1	0	0	68	0	0	1	1
0	0	0	1	0	1	0	0	29	0	1	1	0
1	1	1	0	0	1	0	0	48	0	1	1	0
1	0	0	1	0	1	1	0	50	1	1	1	0
0	0	1	0	0	1	0	0	55	0	1	1	1
1	1	1	0	0	0	0	0	57	0	1	0	0
1	0	1	0	0	1	0	0	57	0	1	1	1
1	0	1	0	0	0	0	0	61	0	1	0	1
1	0	0	0	1	0	0	0	63	0	1	0	0
0	1	0	0	1	1	1	0	65	1	1	1	0
1	0	1	0	0	1	0	1	73	0	1	1	1
1	0	0	0	1	0	0	0	51	0	1	0	0
0	0	0	0	1	1	0	0	59	0	1	1	0
0	0	1	0	0	1	1	0	33	0	1	1	0
0	0	0	1	0	0	1	0	35	0	1	1	0
1	0	1	0	0	1	0	0	35	0	1	1	1
0	0	1	0	0	0	0	0	39	0	1	1	0
1	0	1	0	0	1	0	0	40	0	1	1	0
1	1	0	1	0	0	1	0	41	1	1	1	0
1	1	0	1	0	0	1	0	41	0	1	1	0
0	0	1	0	0	0	0	0	41	0	1	0	0
0	0	0	1	0	1	0	0	41	0	0	1	0
1	0	1	0	0	1	0	0	42	0	1	0	0
0	0	1	0	0	0	0	0	43	0	1	0	0
1	0	0	1	0	0	0	0	43	0	1	0	0
0	0	0	1	0	1	0	0	43	1	1	1	0
1	0	0	1	0	1	0	0	43	0	1	1	0
0	0	1	0	0	0	1	0	44	1	1	0	0
1	1	1	0	0	1	0	0	45	0	1	1	1
0	0	1	0	0	0	0	0	45	0	1	1	1
0	0	1	0	0	0	0	0	45	0	1	0	0
0	0	1	0	0	0	0	0	46	0	1	1	1
1	0	0	0	1	0	0	0	46	0	1	1	0
1	0	0	1	0	0	0	0	47	0	1	0	0
1	1	0	1	0	1	0	0	47	0	1	1	0
1	0	0	1	0	0	0	0	48	0	1	0	1
1	0	0	0	1	1	0	1	48	1	1	1	0
1	0	1	0	0	1	0	0	49	0	1	1	0
1	1	0	1	0	1	0	1	49	1	1	1	1
1	0	0	1	0	1	0	1	50	1	1	1	0
1	0	1	0	0	1	0	0	50	0	1	1	0
1	0	1	0	0	0	0	0	50	0	1	0	1
1	0	0	1	0	1	0	0	51	0	1	1	0
1	0	0	1	0	1	0	0	51	0	1	1	1
0	0	1	1	0	0	0	0	51	0	1	1	0
0	1	0	1	0	1	0	0	51	0	1	1	1
0	1	1	0	0	1	0	0	51	0	1	1	1
0	1	1	0	0	1	0	0	51	0	1	1	0
0	0	0	1	0	1	0	1	52	0	1	1	0
1	1	0	1	0	1	0	0	52	0	1	1	0
0	0	0	1	0	1	0	1	53	0	1	1	1
0	0	0	1	0	1	0	1	53	0	1	1	0
1	0	0	1	0	1	0	1	54	1	1	1	0
1	0	0	1	0	1	1	0	54	0	1	1	1
0	0	1	0	0	1	0	0	54	0	1	1	1
1	1	0	1	0	1	0	0	54	0	1	1	0
1	0	0	1	0	0	0	0	55	0	1	1	0
1	1	1	0	0	0	0	1	55	0	1	0	1
1	0	0	1	0	1	0	0	55	0	1	1	0
0	0	1	0	0	0	0	0	56	0	1	0	1
1	1	0	1	0	0	0	0	56	0	0	0	1
0	0	0	1	0	1	0	1	57	1	1	1	0
1	1	0	1	0	1	0	0	57	0	0	1	1
1	0	1	0	0	1	0	0	58	0	0	1	0
1	0	1	0	0	1	0	0	58	0	1	1	0
1	1	0	1	0	0	0	0	58	0	1	0	0
1	0	1	0	0	1	0	1	58	0	0	1	1
0	0	1	0	0	1	0	0	59	0	1	1	1
1	0	1	0	0	0	0	0	60	0	1	0	0
1	0	0	1	0	1	0	0	60	0	1	0	0
1	0	0	0	1	1	0	0	61	0	1	1	0
1	0	1	0	0	0	0	0	61	0	1	0	1
0	0	1	0	0	1	0	0	62	0	1	1	1
1	0	0	1	0	1	1	0	62	1	1	1	1
1	0	0	0	1	1	0	0	63	0	0	1	0
0	0	0	1	0	1	0	0	64	0	1	0	0
1	0	0	0	1	0	0	0	65	0	0	1	0
0	0	0	1	0	0	0	0	66	0	1	1	0
0	0	0	1	0	1	0	0	66	0	1	1	0
0	0	0	1	0	0	0	0	66	0	1	0	1
1	0	1	0	0	0	0	0	68	0	1	1	0
1	0	0	0	1	1	0	0	69	0	0	0	0
0	0	0	1	0	1	0	0	70	0	0	1	0
1	0	1	0	0	1	0	0	70	0	0	1	1
0	0	0	0	1	0	0	0	70	0	1	1	0
1	0	0	1	0	1	1	0	71	1	1	1	0
0	0	1	0	0	1	0	0	74	0	1	1	0
1	1	0	1	0	1	0	0	75	0	1	1	0
1	0	1	0	0	1	0	1	75	0	0	0	0
0	0	0	1	0	1	0	0	76	1	0	1	0
0	0	0	0	1	1	0	1	76	1	1	0	0
0	0	0	1	0	1	0	0	77	0	1	1	1
1	1	0	1	0	1	0	1	64	0	0	1	0
1	0	1	0	0	1	0	0	58	0	1	1	1
1	0	0	1	0	1	1	0	61	1	1	1	0
1	0	1	0	0	1	1	0	35	0	1	1	1
1	1	1	0	0	1	0	0	48	0	1	1	0
0	0	1	0	0	0	1	0	51	0	1	0	0
0	0	1	0	0	1	0	0	62	0	0	1	1
1	0	1	0	0	1	1	1	64	1	1	1	0
0	1	0	1	0	1	0	0	65	1	0	1	0
0	0	0	0	1	0	0	0	69	0	1	0	0
1	0	0	1	0	0	0	0	61	0	1	0	0
0	0	0	1	0	1	0	0	35	0	1	1	0
1	1	0	1	0	0	0	0	61	0	0	0	0
1	0	0	1	0	1	0	0	32	0	1	1	1
0	0	1	0	0	1	0	0	34	0	1	1	0
0	0	0	1	0	0	0	0	42	1	1	0	0
0	0	1	0	0	0	0	0	42	0	1	1	1
0	1	1	0	0	0	0	0	43	0	1	1	0
1	1	0	1	0	1	0	0	43	0	1	1	0
0	0	0	1	0	0	0	0	45	0	1	0	0
0	0	0	0	1	1	0	1	45	0	1	1	1
1	0	0	1	0	0	0	1	47	0	1	0	0
1	1	1	0	0	1	0	0	47	0	1	1	0
0	0	1	0	0	1	0	0	49	0	1	1	0
1	0	0	0	1	1	0	0	49	0	1	1	0
0	1	0	0	1	1	0	0	50	0	1	1	0
0	0	0	1	0	0	0	0	51	0	1	1	0
0	0	0	1	0	1	1	0	51	0	1	1	0
0	0	0	0	1	0	0	0	51	0	1	0	0
1	1	0	0	1	1	0	0	52	0	1	1	0
1	0	1	0	0	1	0	0	52	0	1	1	1
0	0	1	0	0	0	0	0	53	0	1	0	0
0	0	0	0	1	1	0	0	53	1	1	1	0
1	1	1	0	0	0	0	0	54	0	1	1	1
1	1	1	0	0	0	0	0	54	0	1	0	0
1	0	0	1	0	0	0	0	54	0	1	1	0
0	1	1	0	0	0	0	0	54	0	1	0	0
0	1	0	1	0	1	0	0	54	0	1	1	0
0	0	0	1	0	1	0	0	54	1	1	1	1
0	1	1	0	0	0	0	0	54	0	1	0	0
0	0	1	0	0	1	0	0	54	0	1	1	0
0	0	1	0	0	1	0	0	56	0	1	0	0
1	0	0	1	0	1	0	0	57	0	1	1	0
0	0	0	1	0	0	0	0	58	0	1	0	0
1	0	0	1	0	1	0	0	58	0	1	1	0
1	0	0	1	0	1	0	0	58	0	1	1	0
0	0	1	0	0	1	0	0	58	0	1	1	0
1	0	0	1	0	0	0	0	58	0	1	1	0
1	0	1	0	0	0	0	0	59	0	1	0	1
0	0	1	0	0	0	0	0	60	0	1	0	0
1	0	1	0	0	0	0	0	60	0	1	0	0
1	0	1	0	0	1	0	0	60	0	1	1	0
1	0	0	1	0	0	0	0	61	0	1	1	0
1	0	1	0	0	0	0	0	62	0	1	0	0
0	1	0	1	0	1	0	0	62	0	1	0	0
1	1	0	1	0	1	0	0	63	0	1	0	0
1	0	0	1	0	0	1	0	64	1	1	1	0
1	0	0	1	0	0	0	0	64	0	1	0	0
0	0	0	1	0	1	0	0	64	0	0	0	0
0	1	1	0	0	1	0	0	64	0	1	1	0
1	1	0	1	0	1	0	0	65	1	1	1	0
1	1	1	0	0	1	0	0	65	0	0	1	0
1	1	0	1	0	1	0	0	65	0	1	1	0
0	0	1	0	0	1	0	0	65	0	1	1	0
0	1	1	0	0	0	0	0	66	0	1	0	0
1	1	0	1	0	0	0	0	68	0	0	1	0
1	0	0	1	0	0	0	0	69	0	0	0	0
0	0	0	1	0	1	0	0	70	0	1	1	0
1	1	0	1	0	0	0	1	70	0	0	1	0
1	0	0	1	0	1	0	0	70	0	1	0	1
0	0	0	0	1	1	0	0	72	0	0	1	1
1	0	1	0	0	0	0	0	73	0	1	0	1
1	1	1	0	0	0	0	1	73	0	1	0	0
1	0	0	1	0	0	0	0	75	0	0	1	1
1	0	1	0	0	1	0	0	75	0	1	1	0
1	0	0	1	0	1	1	0	76	1	1	1	1
0	0	0	0	1	1	1	0	76	0	1	1	1
1	1	0	1	0	0	0	0	77	0	1	1	0
1	0	1	0	0	1	0	0	73	0	0	1	0
0	0	0	0	1	1	1	0	63	1	1	1	0
1	0	0	1	0	1	1	0	52	1	1	1	1
0	0	1	0	0	1	0	0	46	0	1	1	1
0	0	1	0	0	1	0	0	36	0	1	1	0
0	1	0	1	0	1	1	0	50	1	1	1	0
0	0	0	1	0	1	0	0	62	0	0	1	1
0	0	0	1	0	1	1	0	62	1	1	1	0
0	0	1	0	0	1	0	0	64	0	1	1	0
1	1	0	0	1	0	1	0	73	1	1	1	1
1	0	0	0	1	1	0	0	75	0	1	1	1
0	0	1	0	0	1	0	0	50	0	1	1	1
1	1	1	0	0	1	0	0	51	0	1	0	1
1	1	1	0	0	1	0	0	52	0	1	1	0
0	0	0	1	0	0	0	0	27	0	1	0	0
0	0	1	0	0	1	0	0	28	0	0	1	0
0	0	0	1	0	1	0	0	31	0	1	1	1
0	0	1	0	0	0	0	0	32	0	0	1	0
1	0	1	0	0	0	0	0	34	0	1	1	1
0	1	0	0	1	1	0	0	35	0	1	1	1
0	0	0	1	0	0	0	0	39	0	1	0	0
1	0	0	0	1	0	0	0	40	0	1	1	0
0	0	1	0	0	0	0	0	41	0	1	0	1
0	0	1	0	0	1	0	0	47	0	1	0	0
0	0	1	0	0	1	0	0	51	0	1	1	0
1	0	0	0	1	0	0	0	51	0	1	0	0
0	1	0	1	0	1	0	1	51	0	1	1	1
0	0	0	1	0	1	1	0	51	1	1	1	1
0	0	0	1	0	0	0	0	52	0	1	0	0
1	0	0	1	0	0	0	0	54	0	1	1	0
1	0	1	0	0	1	0	0	55	0	1	1	0
0	0	1	0	0	1	0	0	55	0	1	1	1
1	1	1	0	0	0	0	0	56	0	1	1	1
1	0	1	0	0	0	0	0	56	0	1	0	0
1	1	0	1	0	1	0	0	56	0	0	1	1
1	0	0	1	0	1	1	1	57	1	1	1	0
0	0	1	0	0	1	0	0	58	0	1	1	0
0	0	1	0	0	1	0	0	58	0	1	1	1
0	0	1	0	0	1	0	0	58	0	1	1	0
1	0	0	1	0	1	0	0	59	0	1	1	1
0	1	0	1	0	1	0	0	60	0	1	1	0
1	0	1	0	0	0	0	0	61	0	0	0	0
1	0	0	1	0	0	1	0	61	1	0	1	1
1	0	1	0	0	1	0	0	61	0	1	1	1
0	0	1	0	0	0	0	0	61	0	0	1	1
1	0	1	0	0	1	1	1	62	0	1	1	1
1	1	0	1	0	1	1	0	62	0	0	1	0
0	0	1	0	0	0	0	0	62	0	1	1	0
0	1	0	1	0	1	0	0	62	0	0	1	1
1	1	0	1	0	1	0	0	62	0	1	1	0
1	0	1	0	0	1	0	0	64	0	0	0	0
1	0	1	0	0	0	0	0	64	0	0	1	1
1	1	1	0	0	1	0	0	65	0	0	1	1
1	0	0	0	1	0	0	0	68	0	1	0	0
1	0	1	0	0	1	0	1	70	0	1	1	1
0	0	0	1	0	0	0	0	70	0	1	1	0
1	0	0	1	0	1	0	0	70	0	0	1	0
1	1	1	0	0	1	0	0	70	0	0	1	0
0	0	0	1	0	1	0	0	70	0	1	1	1
0	0	1	0	0	0	0	0	71	0	1	0	1
0	0	0	1	0	0	1	0	72	1	1	1	0
1	1	0	1	0	1	0	0	72	0	1	1	1
0	0	0	1	0	1	0	0	73	0	1	1	0
1	1	1	0	0	0	0	1	73	0	0	1	0
0	0	1	0	0	1	0	0	73	0	1	1	1
0	0	1	0	0	1	0	0	52	0	1	1	1
1	1	0	1	0	0	1	0	54	0	0	0	1
1	1	1	0	0	0	0	0	58	0	1	0	1
1	0	1	0	0	1	0	0	59	0	0	1	1
1	0	0	1	0	1	0	0	63	0	1	1	0
0	1	0	1	0	1	0	0	61	0	1	0	1
0	0	0	1	0	1	0	0	31	0	1	0	0
0	0	1	0	0	0	0	0	33	0	1	1	0
0	0	0	0	1	1	0	0	37	0	1	1	0
0	0	1	0	0	1	0	0	37	0	1	0	0
1	1	1	0	0	1	0	0	41	0	1	1	1
0	0	1	0	0	1	0	0	41	0	1	1	0
0	0	1	0	0	0	0	0	42	0	1	0	1
0	0	0	1	0	1	0	0	45	0	1	1	0
1	1	1	0	0	1	0	0	45	0	1	1	1
0	0	1	0	0	1	0	0	46	0	1	1	1
0	0	1	0	0	1	0	0	46	0	1	1	1
0	0	1	0	0	1	0	0	47	0	1	1	0
0	0	1	0	0	1	0	0	48	0	0	1	1
0	0	0	0	1	0	0	0	48	0	1	0	0
0	0	0	1	0	1	0	0	48	0	1	1	1
1	0	0	1	0	0	0	0	49	0	0	1	0
0	0	1	0	0	0	0	0	50	0	1	0	0
0	0	0	1	0	0	0	0	50	0	1	1	0
1	1	0	1	0	1	0	0	51	0	1	1	1
0	0	0	0	1	1	1	0	51	0	1	1	0
1	0	0	1	0	1	0	0	51	0	1	1	0
1	1	1	0	0	0	0	0	51	0	1	0	1
1	0	1	0	0	0	1	1	52	0	0	1	0
1	0	1	0	0	1	0	0	52	0	1	0	0
1	0	0	0	1	0	0	0	53	0	1	0	0
1	0	1	0	0	0	0	0	54	0	1	0	0
1	0	0	1	0	0	1	0	57	1	0	0	0
0	0	1	0	0	0	0	0	59	0	0	0	0
0	0	1	0	0	0	0	0	59	0	1	1	1
1	0	1	0	0	0	0	0	59	0	1	1	0
0	0	0	1	0	1	1	0	60	1	0	1	1
1	0	1	0	0	1	0	0	60	0	1	1	0
1	0	1	0	0	1	0	0	60	0	1	1	0
1	0	1	0	0	0	0	0	61	0	0	0	1
1	1	0	1	0	1	1	0	61	1	1	1	1
0	1	0	1	0	1	0	0	62	1	0	1	1
1	1	1	0	0	0	0	0	67	0	1	1	0
0	0	0	1	0	1	0	0	68	0	0	1	0
1	0	0	1	0	1	0	0	69	1	1	1	0
0	0	1	0	0	0	0	0	69	0	0	1	1
0	0	1	0	0	0	0	0	71	0	1	0	0
0	0	0	1	0	1	0	1	72	0	1	1	0
1	1	0	0	1	1	0	0	72	0	0	1	0
0	0	0	1	0	1	0	0	77	0	1	1	1
0	0	0	1	0	1	0	0	57	0	1	1	1
1	0	0	1	0	1	1	1	62	0	1	1	1
0	0	1	0	0	0	0	0	48	0	1	0	0
0	0	1	0	0	1	0	0	55	0	1	1	1
0	1	0	1	0	0	0	0	74	0	0	0	1
1	1	0	0	1	1	0	0	63	1	0	1	1
0	0	0	1	0	1	0	0	38	0	1	1	0
1	0	1	0	0	1	0	0	41	0	1	1	0
0	0	1	0	0	1	0	0	42	0	1	1	0
0	0	0	0	1	0	0	0	48	0	1	1	0
0	0	1	0	0	1	0	0	48	0	1	1	1
0	0	1	0	0	1	0	1	50	0	1	1	0
0	0	0	1	0	0	0	0	50	0	1	1	1
0	0	1	0	0	1	0	0	53	0	1	1	0
0	0	0	1	0	0	0	0	53	0	1	1	0
1	1	1	0	0	1	0	0	53	0	1	1	1
0	1	0	0	1	1	0	0	53	0	1	1	0
1	0	0	1	0	0	0	0	58	0	0	1	0
1	1	1	0	0	1	0	0	58	0	0	1	1
0	0	0	1	0	0	0	0	59	0	1	0	0
1	0	0	1	0	0	0	0	60	0	1	1	0
1	1	0	0	1	0	0	0	62	0	1	1	0
1	1	0	1	0	1	0	0	63	1	0	1	1
1	0	0	1	0	1	0	0	64	1	0	1	1
1	1	1	0	0	0	0	0	64	0	1	1	1
0	0	1	0	0	1	0	0	65	0	1	1	1
0	1	1	0	0	1	0	0	65	0	1	1	0
1	1	1	0	0	1	0	0	68	0	1	1	0
0	1	1	0	0	1	0	1	69	0	0	1	0
0	0	0	1	0	1	0	0	74	0	0	1	1
1	0	0	0	1	1	0	0	74	0	0	0	1
0	0	0	1	0	0	0	0	78	1	1	1	0
1	1	1	0	0	0	0	0	55	0	1	1	1
0	0	1	0	0	1	0	1	44	0	1	1	0
0	0	1	0	0	0	0	0	28	0	1	0	0
0	1	0	1	0	0	0	0	40	0	1	0	0
1	0	0	0	1	1	0	0	43	0	1	1	0
0	1	1	0	0	0	0	0	44	0	1	0	1
1	0	1	0	0	0	0	0	47	0	1	1	0
0	0	0	1	0	1	0	0	49	0	1	1	0
0	0	1	0	0	1	0	0	50	0	1	1	0
1	0	1	0	0	0	0	0	51	0	1	0	0
0	1	0	1	0	1	0	1	51	0	1	1	0
0	0	0	0	1	1	0	0	52	0	1	0	0
0	0	1	0	0	1	0	0	52	0	1	1	0
1	0	0	0	1	1	0	0	53	0	1	0	0
0	0	0	1	0	1	1	1	54	1	1	1	1
0	0	1	0	0	1	0	1	55	0	1	1	0
1	0	1	0	0	0	0	0	59	0	0	0	1
0	0	1	0	0	1	0	0	59	0	1	0	0
1	1	0	1	0	1	0	0	59	1	1	0	0
1	0	0	1	0	1	0	1	59	0	1	1	1
0	0	0	0	1	0	0	0	60	0	1	0	0
0	0	1	0	0	1	0	0	61	0	1	1	1
0	0	0	1	0	0	0	0	61	0	1	0	1
0	0	1	0	0	1	0	0	63	0	0	1	0
1	0	0	0	1	0	0	0	64	0	1	1	0
1	0	1	0	0	1	0	0	64	0	1	0	0
1	0	0	1	0	1	0	0	64	0	0	1	1
1	0	1	0	0	1	0	0	65	0	0	1	0
0	0	1	0	0	0	0	0	68	0	1	0	1
0	0	1	0	0	0	0	0	75	0	1	1	0
1	0	0	1	0	0	0	0	77	0	1	0	1
0	0	1	0	0	1	0	0	60	0	1	1	0
1	0	0	1	0	1	1	0	76	1	0	1	0
0	0	1	0	0	0	0	0	42	0	1	1	0
0	0	1	0	0	0	0	0	42	0	1	0	0
1	0	1	0	0	1	0	0	52	0	1	0	0
1	1	1	0	0	0	0	0	53	0	1	0	1
1	1	0	1	0	1	0	1	57	0	1	1	1
0	0	1	0	0	1	0	0	58	0	1	1	0
0	1	1	0	0	1	0	0	59	0	1	1	1
0	0	1	0	0	0	0	0	62	0	1	1	1
0	0	0	1	0	0	0	0	65	0	1	0	0
1	1	1	0	0	1	0	1	62	0	1	1	0
0	0	0	1	0	0	0	0	63	0	1	1	0
0	0	1	0	0	0	0	0	37	0	1	0	1
1	0	1	0	0	0	0	0	39	0	1	0	0
0	0	1	0	0	0	0	0	45	0	1	0	1
1	0	1	0	0	1	0	0	49	0	1	1	1
1	0	0	1	0	0	0	0	51	0	1	0	0
0	1	1	0	0	0	0	0	52	0	1	1	0
0	0	1	0	0	1	0	0	54	0	1	1	0
1	0	1	0	0	1	0	0	55	0	1	1	0
0	0	1	0	0	1	0	0	55	0	1	1	0
1	0	0	1	0	0	0	0	57	0	1	0	1
1	0	0	1	0	0	0	0	58	0	1	0	1
1	1	0	1	0	1	0	0	58	0	0	1	0
1	1	0	1	0	0	0	0	61	0	1	0	0
0	0	1	0	0	0	0	0	64	0	1	0	0
1	0	1	0	0	1	0	0	69	0	1	1	0
1	1	1	0	0	0	0	0	72	0	1	0	1
1	0	1	0	0	1	0	0	74	0	1	1	1
0	0	1	0	0	1	0	1	45	0	1	1	0
1	1	1	0	0	1	0	0	58	0	1	1	1
1	0	0	1	0	1	0	0	49	0	1	1	0
0	1	1	0	0	1	0	0	55	0	1	1	0
1	0	0	0	1	1	1	1	58	1	1	1	1
1	0	1	0	0	0	0	1	58	0	1	0	0
0	0	0	1	0	1	0	0	64	1	0	1	0
1	0	0	0	1	0	0	0	65	0	1	0	0
1	0	1	0	0	1	0	0	68	0	1	1	1
0	0	0	1	0	0	1	0	50	1	1	1	0
1	0	0	1	0	1	0	0	52	0	1	1	1
0	0	1	0	0	0	0	0	67	0	1	1	1
1	0	1	0	0	1	0	0	49	0	1	0	1
0	0	0	1	0	1	1	0	57	0	1	1	1
1	0	0	1	0	1	0	0	39	0	0	1	0
0	0	1	0	0	0	0	0	39	0	1	1	1
0	0	0	1	0	1	0	0	58	1	1	1	1
1	1	0	0	1	0	0	0	66	0	1	0	0
1	0	0	1	0	1	0	0	68	1	0	1	1
0	1	0	0	1	1	0	0	69	0	1	1	0
0	0	0	1	0	1	0	0	72	1	1	1	0
1	0	0	1	0	1	0	0	72	1	0	1	0
1	0	0	1	0	0	0	0	78	0	1	0	0
1	0	0	1	0	0	0	0	66	0	1	0	0
0	0	1	0	0	1	0	0	55	0	1	1	1
1	1	0	1	0	1	1	1	75	1	1	1	1
0	1	0	1	0	1	0	0	63	0	1	1	0
0	0	1	0	0	1	0	0	68	0	0	1	0
0	1	1	0	0	1	0	0	30	0	1	1	1
0	0	1	0	0	1	0	0	48	0	1	1	0
1	0	0	1	0	0	0	0	52	0	1	1	0
0	0	0	1	0	1	0	0	60	1	1	1	1
1	0	1	0	0	1	0	0	61	1	1	1	1
1	0	0	1	0	1	0	0	62	0	1	1	1
1	0	1	0	0	0	0	0	67	0	0	1	1
0	0	0	1	0	1	0	0	31	1	0	1	1
1	0	0	0	1	0	0	0	47	0	1	1	1
0	0	1	0	0	1	0	0	45	0	0	1	0
0	0	1	0	0	1	1	0	63	0	1	1	1
0	1	0	1	0	1	0	1	54	0	1	1	1
1	0	1	0	0	1	0	0	57	0	0	1	0
0	0	0	1	0	1	0	0	42	0	1	1	1
0	1	1	0	0	0	0	0	46	0	1	0	1
0	0	0	1	0	0	0	0	52	0	1	0	0
1	1	1	0	0	1	0	0	53	0	1	1	1
1	1	1	0	0	0	0	1	55	1	1	1	1
1	0	1	0	0	1	0	0	58	0	1	1	1
1	0	0	0	1	0	0	0	65	0	1	1	1
1	0	0	1	0	1	0	1	72	0	1	1	1
1	0	0	1	0	0	0	1	67	0	1	1	0
0	0	1	0	0	1	1	0	44	1	1	1	0
0	0	1	0	0	1	0	0	27	0	1	1	0
0	0	1	0	0	1	0	0	60	0	1	1	1
0	0	1	0	0	1	0	0	43	0	1	1	0
1	1	0	1	0	1	0	0	50	0	1	1	1
0	0	0	1	0	1	0	0	54	1	1	1	1
1	0	0	0	1	0	0	0	55	0	1	1	0
1	0	0	0	1	0	0	0	56	0	1	1	0
0	0	1	0	0	0	0	0	65	0	1	1	1
0	1	1	0	0	0	0	0	69	0	1	0	0
0	0	0	1	0	1	0	0	70	1	1	1	1
1	0	0	1	0	1	1	0	69	0	0	1	1
0	1	0	1	0	1	1	0	44	1	1	1	0
1	0	0	1	0	1	1	1	47	1	1	1	1
0	0	1	0	0	1	0	0	58	0	1	1	1
1	0	0	0	1	1	1	1	58	1	1	1	1
0	0	0	1	0	1	1	0	59	1	1	1	0
0	0	0	1	0	1	0	0	73	0	1	1	0
0	0	1	0	0	1	0	0	37	0	1	1	0
1	0	1	0	0	0	0	0	72	0	1	1	0
0	0	0	1	0	1	1	1	41	1	1	1	0
0	0	0	1	0	1	0	0	60	0	1	1	0
0	0	0	1	0	1	0	0	41	0	1	1	1
1	0	1	0	0	1	0	0	42	0	1	1	0
1	0	1	0	0	1	0	1	58	0	1	1	0
0	0	0	1	0	1	0	0	62	0	1	1	0
0	1	1	0	0	0	0	0	64	0	1	1	0
1	0	1	0	0	0	0	1	67	0	0	0	0
1	0	1	0	0	1	0	0	69	0	1	1	0
1	0	0	1	0	1	0	0	56	0	1	1	1
1	0	1	0	0	1	0	0	43	0	1	1	1
1	1	0	0	1	0	0	0	45	0	1	0	0
0	0	0	0	1	0	0	0	37	0	1	1	1
1	0	1	0	0	0	0	0	39	0	0	1	1
0	0	1	0	0	0	0	0	70	0	1	0	0
0	0	0	0	1	0	0	0	55	0	1	1	1
0	0	0	1	0	0	0	0	46	1	1	0	1
0	0	0	1	0	0	0	0	38	0	1	0	0
0	0	0	0	1	1	0	0	58	0	1	1	0
0	0	0	0	1	0	0	0	63	0	0	0	0
1	1	1	0	0	0	0	0	65	0	1	1	1
0	1	1	0	0	0	0	0	39	0	1	0	0
1	0	1	0	0	1	0	0	41	0	1	0	0
0	0	0	0	1	1	1	0	50	1	1	1	0
0	0	1	0	0	0	0	0	54	0	1	0	1
1	0	1	0	0	1	0	0	60	0	1	1	0
1	1	1	0	0	0	0	0	61	0	1	0	1
0	0	1	0	0	1	0	0	61	0	1	1	0
1	0	0	1	0	1	0	0	61	0	1	0	0
0	0	0	1	0	0	0	0	63	0	1	0	1
0	0	0	1	0	0	0	0	63	0	1	0	0
0	0	0	1	0	0	0	0	63	0	1	0	1
1	0	0	1	0	1	0	0	65	0	1	1	0
1	0	0	1	0	1	0	0	77	0	0	0	0
1	0	0	1	0	0	0	0	52	0	1	0	1
0	0	1	0	0	0	0	0	37	0	1	0	1
1	0	0	1	0	1	0	0	38	1	1	1	0
0	0	0	0	1	1	0	0	39	0	1	1	0
1	0	1	0	0	0	0	0	39	0	1	0	1
0	1	0	1	0	1	0	0	42	0	1	1	0
0	1	1	0	0	0	0	0	44	0	1	1	0
0	0	0	0	1	1	0	0	44	1	1	1	0
0	1	0	1	0	1	0	0	47	0	1	1	1
0	0	0	1	0	1	0	0	48	0	1	0	0
1	0	1	0	0	0	0	1	48	0	1	0	0
1	1	1	0	0	1	0	0	48	0	1	1	0
0	0	0	1	0	0	0	0	52	0	1	1	0
1	0	0	1	0	1	0	1	52	0	1	1	0
0	0	1	0	0	1	0	0	53	0	1	1	0
0	0	0	1	0	1	0	0	55	0	1	1	1
0	0	1	0	0	1	0	0	55	0	0	1	1
1	1	1	0	0	0	0	0	56	0	1	0	1
1	0	1	0	0	1	0	0	58	0	1	1	1
1	1	1	0	0	0	0	0	60	0	1	0	0
1	1	0	1	0	1	1	1	60	0	1	1	0
1	1	0	1	0	1	0	0	60	0	1	0	0
0	1	1	0	0	1	0	0	60	0	1	1	1
1	0	1	0	0	0	0	0	61	0	0	1	1
1	0	1	0	0	0	0	0	61	0	1	0	0
1	0	0	1	0	1	0	0	62	0	1	1	0
1	0	1	0	0	1	0	0	62	0	1	1	0
1	0	1	0	0	0	0	0	63	0	1	0	1
1	1	1	0	0	0	0	0	65	0	1	1	0
1	1	0	1	0	1	0	0	65	0	1	0	1
0	0	0	1	0	1	0	0	65	0	1	1	0
0	0	0	1	0	1	0	1	65	1	1	1	0
1	0	1	0	0	1	0	0	72	0	1	1	1
1	1	0	1	0	1	0	0	73	0	1	1	0
1	0	1	0	0	0	0	0	75	0	1	1	0
1	0	0	1	0	0	0	0	79	0	1	1	0
0	1	1	0	0	1	0	0	53	0	1	1	1
1	1	1	0	0	0	0	0	64	0	1	0	1
0	0	0	1	0	1	0	0	48	1	1	1	0
0	0	0	1	0	0	0	0	51	0	1	0	0
0	0	1	0	0	1	0	0	52	0	1	1	0
1	1	0	0	1	0	1	0	57	0	1	1	0
1	0	1	0	0	1	0	0	65	0	1	1	0
1	0	0	1	0	1	0	0	52	0	1	1	1
1	1	0	1	0	1	0	0	25	0	1	0	0
1	0	0	1	0	1	0	0	34	1	1	1	1
0	0	0	1	0	1	0	0	35	0	1	0	1
1	1	0	0	1	1	0	0	36	0	1	1	1
0	1	0	1	0	0	0	0	39	0	1	1	0
0	0	1	0	0	1	0	0	42	0	1	0	0
1	0	0	0	1	1	0	0	42	0	1	1	1
0	0	1	0	0	1	1	0	43	0	1	1	1
0	0	0	1	0	1	0	0	45	0	1	1	1
0	0	1	0	0	1	0	1	45	0	1	0	1
0	0	0	1	0	0	0	0	46	0	1	0	1
0	0	0	1	0	1	0	0	48	0	1	1	0
1	0	1	0	0	1	0	0	49	0	1	1	0
1	1	0	1	0	1	0	0	50	1	1	1	1
0	0	1	0	0	1	0	0	50	0	0	1	0
0	0	0	1	0	0	0	0	50	0	1	0	1
1	0	0	1	0	1	0	0	51	0	1	1	1
1	1	1	0	0	0	0	0	52	0	1	1	1
0	0	0	1	0	1	0	0	53	0	1	1	1
0	0	0	1	0	1	1	0	53	1	1	1	0
1	1	1	0	0	1	0	0	53	0	1	1	0
1	0	1	0	0	1	0	0	53	0	1	1	1
1	1	1	0	0	1	0	0	53	0	1	1	0
0	0	0	0	1	1	1	0	54	1	1	1	1
1	0	0	1	0	1	0	0	54	0	1	0	0
1	0	1	0	0	1	0	0	54	0	1	1	1
1	0	0	0	1	0	0	1	55	0	1	0	1
1	0	0	0	1	1	0	0	55	0	1	0	0
1	0	0	1	0	1	0	0	56	0	1	1	0
0	0	0	1	0	1	0	0	56	1	1	1	1
0	0	1	0	0	0	0	0	57	0	1	0	1
0	1	0	0	1	1	1	0	57	1	1	1	0
1	1	0	0	1	0	0	0	57	0	1	1	0
0	1	1	0	0	1	1	0	57	0	1	1	0
1	0	0	1	0	1	1	1	57	1	1	1	0
1	0	0	1	0	1	0	0	58	0	0	0	1
0	0	0	1	0	1	0	0	59	0	1	1	1
1	1	0	1	0	0	0	0	59	0	1	0	1
0	0	1	0	0	1	0	0	59	0	1	1	1
0	0	0	1	0	0	1	0	60	1	1	1	1
0	0	1	0	0	1	0	0	60	0	0	1	0
0	0	0	0	1	0	0	0	61	0	1	0	1
1	0	0	1	0	1	0	0	61	1	1	1	0
1	0	0	0	1	1	1	0	61	0	1	0	0
1	0	0	1	0	1	1	1	61	1	1	1	0
1	0	0	1	0	1	0	0	63	0	0	0	0
0	0	1	0	0	1	0	0	64	0	1	0	0
1	0	0	1	0	1	0	0	64	0	1	1	1
0	1	0	1	0	1	0	0	65	1	1	1	0
0	0	1	0	0	0	0	0	68	0	1	0	0
1	0	0	1	0	0	0	0	69	1	1	1	1
1	0	0	1	0	0	0	0	72	0	0	1	1
1	0	0	1	0	1	0	0	72	0	1	0	0
0	1	1	0	0	1	0	0	73	0	1	1	0
1	0	1	0	0	0	0	0	76	0	1	0	0
1	1	0	1	0	0	0	0	77	0	1	0	1
0	0	0	1	0	1	1	0	79	1	0	1	0
0	0	0	1	0	1	0	0	80	0	1	1	1
1	0	0	1	0	1	0	0	47	0	1	1	1
0	1	0	1	0	0	0	0	60	0	0	0	0
0	0	0	1	0	1	0	1	44	0	1	1	0
0	0	1	0	0	1	0	0	36	0	1	1	1
0	1	1	0	0	0	0	0	39	0	1	0	0
1	0	0	1	0	1	0	0	47	1	1	1	0
0	0	1	0	0	1	0	1	51	0	1	0	0
0	0	0	0	1	1	0	0	53	0	1	0	1
1	0	1	0	0	1	0	0	55	0	0	0	0
1	0	0	1	0	0	0	0	56	0	1	0	1
1	0	0	1	0	1	0	0	58	1	0	1	1
1	0	1	0	0	0	0	0	59	0	0	0	1
0	1	0	1	0	1	0	1	61	0	1	1	0
0	0	1	0	0	0	0	0	70	0	1	0	0
0	1	1	0	0	1	0	0	53	0	1	1	0
1	0	0	0	1	0	0	0	70	0	0	1	0
1	0	0	1	0	1	0	0	54	0	1	1	0
0	0	0	1	0	1	0	0	56	1	1	1	0
0	0	1	0	0	0	0	0	64	0	1	0	1
0	0	0	1	0	1	0	0	75	0	0	1	0
0	0	0	1	0	1	0	0	30	0	1	1	0
1	0	0	1	0	0	0	0	34	0	1	0	0
1	0	1	0	0	1	0	0	36	0	1	1	0
1	0	1	0	0	0	0	0	37	0	1	1	1
0	1	1	0	0	1	0	0	39	0	1	1	0
1	0	1	0	0	1	0	0	42	0	1	1	0
1	0	0	0	1	0	0	0	43	0	1	0	0
0	0	1	0	0	1	0	0	44	0	1	1	1
1	0	0	1	0	1	0	0	44	1	1	1	0
0	0	1	0	0	1	0	0	45	0	1	1	0
1	0	1	0	0	1	1	1	45	0	0	1	0
0	0	1	0	0	0	0	0	45	0	1	1	0
0	1	0	1	0	1	0	0	46	0	1	1	0
0	0	0	1	0	1	0	0	46	0	1	1	1
0	0	0	0	1	0	0	0	46	0	1	0	0
0	0	1	0	0	1	0	0	46	0	1	1	0
1	0	0	0	1	1	0	0	46	0	1	0	0
1	1	1	0	0	1	0	0	47	0	1	1	0
0	0	0	0	1	1	0	0	47	1	1	1	1
1	0	0	1	0	1	1	0	48	1	1	1	0
1	1	1	0	0	1	0	0	48	0	1	0	1
1	0	1	0	0	1	0	0	48	0	1	1	0
0	1	0	0	1	0	0	0	49	0	1	0	1
0	0	0	1	0	0	0	0	49	0	1	0	1
1	0	1	0	0	1	0	0	49	0	1	1	0
0	0	1	0	0	1	0	1	49	0	1	1	0
1	0	1	0	0	1	0	0	49	0	1	1	1
1	1	1	0	0	0	0	0	50	0	0	1	1
1	0	0	1	0	1	0	0	50	0	1	1	1
1	1	1	0	0	0	0	0	50	0	0	0	1
1	0	0	0	1	1	0	0	51	0	1	1	0
1	1	1	0	0	1	0	0	51	0	1	1	0
1	1	0	0	1	1	0	0	52	0	1	1	1
1	0	1	0	0	1	0	0	53	0	0	1	0
1	0	1	0	0	0	0	0	53	0	1	1	0
0	1	1	0	0	0	0	0	53	0	1	0	1
0	0	0	1	0	0	0	0	54	0	1	1	0
0	0	0	1	0	1	0	0	54	1	1	1	0
1	0	0	1	0	1	0	0	54	1	1	1	0
0	0	0	1	0	1	0	0	54	0	1	1	0
0	0	1	0	0	0	0	0	54	0	1	0	0
0	0	1	0	0	0	0	0	55	0	1	0	1
1	1	0	1	0	1	0	0	56	0	0	0	1
0	0	0	0	1	0	0	0	56	0	1	0	0
[truncated: 537 more rows]
